# Supplementary material for: Temporal Variability of Escherichia coli Diversity in the Gastrointestinal Tracts of Tanzanian Children with and without Exposure to Antibiotics
Source: PubMed Central journal article supplement (PMC6222053; doi:10.1128/msphere.00558-18), 2018-11-07
Supplement: sph006182690st1.pdf [file sph006182690st1.pdf]

Table S1. Subject and isolate information

| Subject and Isolate Data |     |        |     |          |         |            |               |        |                | Genome assembly information |               |             |       |                |      | Strain information |                               |  |
|--------------------------|-----|--------|-----|----------|---------|------------|---------------|--------|----------------|-----------------------------|---------------|-------------|-------|----------------|------|--------------------|-------------------------------|--|
| Subject ID               | MDA | Age    | Sex | Diarrhea | Date    | Time point | Time point ID | Colony | Assembly ID    | WGS Accession               | SRA Accession | Genome size | %GC   | No. of contigs | MLST | Phylogroup         | Serotype                      |  |
| 1-110-08                 | Yes | 2 yrs  | M   | no       | 1/13/09 | baseline   | S1            | C1     | 1_110_08_S1_C1 | JHDQ000000000               | SR5567978     | 4910285     | 50.67 | 128            | 10   | A                  | O159:H4                       |  |
| 1-110-08                 | Yes | 2 yrs  | M   | no       | 1/13/09 | baseline   | S1            | C2     | 1_110_08_S1_C2 | JHDP000000000               | SR5568148     | 5010726     | 50.7  | 137            | 155  | B1                 | O136:H25                      |  |
| 1-110-08                 | Yes | 2 yrs  | M   | no       | 1/13/09 | baseline   | S1            | C3     | 1_110_08_S1_C3 | JHDO000000000               | SR5568343     | 4953256     | 50.71 | 133            | 10   | A                  | O159:H4                       |  |
| 1-110-08                 | Yes | 2 yrs  | M   | no       | 4/11/09 | 3-month    | S3            | C1     | 1_110_08_S3_C1 | JHDN000000000               | SR5568156     | 5520284     | 50.42 | 189            | 10   | A                  | O176:H33                      |  |
| 1-110-08                 | Yes | 2 yrs  | M   | no       | 4/11/09 | 3-month    | S3            | C2     | 1_110_08_S3_C2 | JHDM000000000               | SR5568140     | 5489145     | 50.41 | 176            | 10   | A                  | O176:H33                      |  |
| 1-110-08                 | Yes | 2 yrs  | M   | no       | 4/11/09 | 3-month    | S3            | C3     | 1_110_08_S3_C3 | JHDL000000000               | SR5568168     | 5514291     | 50.42 | 175            | 10   | A                  | O176:H33                      |  |
| 1-110-08                 | Yes | 2 yrs  | M   | no       | 7/4/09  | 6-month    | S4            | C1     | 1_110_08_S4_C1 | JHDK000000000               | SR5568248     | 5498100     | 50.53 | 159            | 38   | D                  | O86:H18                       |  |
| 1-110-08                 | Yes | 2 yrs  | M   | no       | 7/4/09  | 6-month    | S4            | C2     | 1_110_08_S4_C2 | JHDI000000000               | SR5568229     | 5219753     | 50.81 | 199            | 10   | A                  | NT:H16                        |  |
| 1-110-08                 | Yes | 2 yrs  | M   | no       | 7/4/09  | 6-month    | S4            | C3     | 1_110_08_S4_C3 | JHDI000000000               | SR5568328     | 5200020     | 50.8  | 196            | 10   | A                  | NT:H16                        |  |
| 1-176-05                 | Yes | 2 yrs  | F   | no       | 1/13/09 | baseline   | S1            | C1     | 1_176_05_S1_C1 | JHDI000000000               | SR5568397     | 5132963     | 50.83 | 173            | 10   | A                  | O107/O117:H10 Gp8             |  |
| 1-176-05                 | Yes | 2 yrs  | F   | no       | 1/13/09 | baseline   | S1            | C2     | 1_176_05_S1_C2 | JJMA000000000               | SR5568076     | 5151035     | 50.85 | 174            | 10   | A                  | O107/O117:H10 Gp8             |  |
| 1-176-05                 | Yes | 2 yrs  | F   | no       | 1/13/09 | baseline   | S1            | C3     | 1_176_05_S1_C3 | JJLY000000000               | SR5568351     | 5178244     | 50.88 | 157            | 10   | A                  | O107/O117:H10 Gp8             |  |
| 1-176-05                 | Yes | 2 yrs  | F   | no       | 4/11/09 | 3-month    | S3            | C1     | 1_176_05_S3_C1 | JHDI000000000               | SR5568264     | 5327796     | 50.79 | 189            | 206  | A                  | O101/O162:H5 Gp15             |  |
| 1-176-05                 | Yes | 2 yrs  | F   | no       | 4/11/09 | 3-month    | S3            | C2     | 1_176_05_S3_C2 | JHDF000000000               | SR5568379     | 4457870     | 50.67 | 69             | 5792 | cryptic            | O13/O129/O135:H5 Gp10         |  |
| 1-176-05                 | Yes | 2 yrs  | F   | no       | 7/3/09  | 6-month    | S4            | C1     | 1_176_05_S4_C1 | JJLQ000000000               | SR5568352     | 5179950     | 50.83 | 180            | 10   | A                  | NT:H16                        |  |
| 1-176-05                 | Yes | 2 yrs  | F   | no       | 7/3/09  | 6-month    | S4            | C2     | 1_176_05_S4_C2 | JMGW000000000               | SR5568164     | 5065396     | 50.92 | 164            | 10   | A                  | NT:H16                        |  |
| 1-176-05                 | Yes | 2 yrs  | F   | no       | 7/3/09  | 6-month    | S4            | C3     | 1_176_05_S4_C3 | JJLI000000000               | SR5568019     | 5168201     | 50.8  | 194            | 10   | A                  | NT:H16                        |  |
| 1-182-04                 | Yes | < 1 yr | M   | no       | 1/13/09 | baseline   | S1            | C1     | 1_182_04_S1_C1 | JJMD000000000               | SR5568367     | 5117656     | 50.64 | 89             | 23   | B1                 | O8:H9                         |  |
| 1-182-04                 | Yes | < 1 yr | M   | no       | 1/13/09 | baseline   | S1            | C2     | 1_182_04_S1_C2 | JMGS000000000               | SR5568340     | 4982681     | 50.54 | 114            | 23   | B1                 | O8:H9                         |  |
| 1-182-04                 | Yes | < 1 yr | M   | no       | 1/13/09 | baseline   | S1            | C3     | 1_182_04_S1_C3 | JJLX000000000               | SR5568142     | 5044280     | 50.56 | 89             | 23   | B1                 | O8:H9                         |  |
| 1-182-04                 | Yes | < 1 yr | M   | no       | 4/11/09 | 3-month    | S3            | C1     | 1_182_04_S3_C1 | JJLV000000000               | SR5568331     | 5135834     | 50.83 | 306            | 5275 | A                  | NT:H30                        |  |
| 1-182-04                 | Yes | < 1 yr | M   | no       | 4/11/09 | 3-month    | S3            | C2     | 1_182_04_S3_C2 | JJLT000000000               | SR5568249     | 4581474     | 50.89 | 261            | 5275 | A                  | NT:H30                        |  |
| 1-182-04                 | Yes | < 1 yr | M   | no       | 4/11/09 | 3-month    | S3            | C3     | 1_182_04_S3_C3 | JJLS000000000               | SR5568158     | 5179152     | 50.76 | 306            | 5275 | A                  | NT:H30                        |  |
| 1-182-04                 | Yes | < 1 yr | M   | no       | 7/4/09  | 6-month    | S4            | C1     | 1_182_04_S4_C1 | JJLP000000000               | SR5568244     | 5130349     | 50.74 | 109            | 2186 | B1                 | O182:H23                      |  |
| 1-182-04                 | Yes | < 1 yr | M   | no       | 7/4/09  | 6-month    | S4            | C2     | 1_182_04_S4_C2 | JJLM000000000               | SR5568332     | 5151350     | 50.77 | 88             | 2186 | B1                 | O182:H23                      |  |
| 1-182-04                 | Yes | < 1 yr | M   | no       | 7/4/09  | 6-month    | S4            | C3     | 1_182_04_S4_C3 | JJLH000000000               | SR5568031     | 5100380     | 50.76 | 106            | 2186 | B1                 | O182:H23                      |  |
| 1-250-04                 | Yes | < 1 yr | M   | yes      | 1/12/09 | baseline   | S1            | C1     | 1_250_04_S1_C1 | JNQB000000000               | SR5568022     | 5177057     | 50.62 | 108            | 449  | D                  | O17/O44/O73/O77/O106:H18 Gp9  |  |
| 1-250-04                 | Yes | < 1 yr | M   | yes      | 1/12/09 | baseline   | S1            | C2     | 1_250_04_S1_C2 | JNQC000000000               | SR5568254     | 5159098     | 50.61 | 103            | 449  | D                  | O17/O44/O73/O77/O106:H18 Gp9  |  |
| 1-250-04                 | Yes | < 1 yr | M   | yes      | 1/12/09 | baseline   | S1            | C3     | 1_250_04_S1_C3 | JJLW000000000               | SR5568159     | 5095530     | 50.59 | 169            | 449  | D                  | O17/O44/O73/O77/O106:H18 Gp9  |  |
| 1-250-04                 | Yes | < 1 yr | M   | no       | 4/11/09 | 3-month    | S3            | C1     | 1_250_04_S3_C1 | JJLU000000000               | SR5568284     | 5098119     | 50.93 | 203            | 3036 | F                  | O97:H45                       |  |
| 1-250-04                 | Yes | < 1 yr | M   | no       | 4/11/09 | 3-month    | S3            | C2     | 1_250_04_S3_C2 | JOSR000000000               | SR5572002     | 5318327     | 50.91 | 306            | 3036 | F                  | O97:H45                       |  |
| 1-250-04                 | Yes | < 1 yr | M   | no       | 7/4/09  | 6-month    | S4            | C1     | 1_250_04_S4_C1 | JJLO000000000               | SR5568193     | 5221656     | 50.84 | 162            | 746  | A                  | O61:H21                       |  |
| 1-250-04                 | Yes | < 1 yr | M   | no       | 7/4/09  | 6-month    | S4            | C2     | 1_250_04_S4_C2 | JJLL000000000               | SR5568392     | 5235472     | 50.84 | 168            | 746  | A                  | O61:H21                       |  |
| 1-392-07                 | Yes | < 1 yr | M   | no       | 1/12/09 | baseline   | S1            | C1     | 1_392_07_S1_C1 | JNPT000000000               | SR5568024     | 5422993     | 50.42 | 174            | 38   | D                  | O86:H5                        |  |
| 1-392-07                 | Yes | < 1 yr | M   | no       | 1/12/09 | baseline   | S1            | C2     | 1_392_07_S1_C2 | JNPU000000000               | SR5568304     | 5490294     | 50.43 | 138            | 38   | D                  | O86:H5                        |  |
| 1-392-07                 | Yes | < 1 yr | M   | no       | 4/9/09  | 3-month    | S3            | C1     | 1_392_07_S3_C1 | JNPP000000000               | SR5568368     | 4905892     | 50.91 | 218            | 1602 | A                  | NT                            |  |
| 1-392-07                 | Yes | < 1 yr | M   | no       | 4/9/09  | 3-month    | S3            | C2     | 1_392_07_S3_C2 | JNPP000000000               | SR5568155     | 4906646     | 50.9  | 216            | 1602 | A                  | NT                            |  |
| 1-392-07                 | Yes | < 1 yr | M   | no       | 4/9/09  | 3-month    | S3            | C3     | 1_392_07_S3_C3 | JJLR000000000               | SR5568326     | 4922974     | 50.9  | 222            | 1602 | A                  | NT                            |  |
| 1-392-07                 | Yes | < 1 yr | M   | no       | 7/3/09  | 6-month    | S4            | C1     | 1_392_07_S4_C1 | JOSK000000000               | SR5572003     | 5805306     | 50.61 | 412            | 223  | B1                 | O132:H16                      |  |
| 1-392-07                 | Yes | < 1 yr | M   | no       | 7/3/09  | 6-month    | S4            | C2     | 1_392_07_S4_C2 | JJLK000000000               | SR5568345     | 5052082     | 50.8  | 91             | 3497 | B1                 | O8:H30                        |  |
| 1-392-07                 | Yes | < 1 yr | M   | no       | 7/3/09  | 6-month    | S4            | C3     | 1_392_07_S4_C3 | JOSH000000000               | SR5572004     | 5806384     | 50.62 | 268            | 223  | B1                 | O132:H16                      |  |
| 2-005-03                 | No  | < 1 yr | M   | yes      | 1/23/09 | baseline   | S1            | C1     | 2_005_03_S1_C1 | JJME000000000               | SR5568279     | 5253303     | 50.56 | 158            | 5257 | B1                 | O8:H12                        |  |
| 2-005-03                 | No  | < 1 yr | M   | yes      | 1/23/09 | baseline   | S1            | C2     | 2_005_03_S1_C2 | JJMC000000000               | SR5568145     | 5258795     | 50.54 | 155            | 5257 | B1                 | O8:H12                        |  |
| 2-005-03                 | No  | < 1 yr | M   | yes      | 1/23/09 | baseline   | S1            | C3     | 2_005_03_S1_C3 | JJLZ000000000               | SR5568165     | 5271896     | 50.56 | 166            | 5257 | E                  | O8:H12                        |  |
| 2-005-03                 | No  | < 1 yr | M   | no       | 4/23/09 | 3-month    | S3            | C1     | 2_005_03_S3_C1 | JNPQ000000000               | SR5568327     | 5299384     | 50.67 | 168            | 2178 | B1                 | O81:H27                       |  |
| 2-005-03                 | No  | < 1 yr | M   | no       | 4/23/09 | 3-month    | S3            | C2     | 2_005_03_S3_C2 | JMGTO000000000              | SR5568080     | 5310180     | 50.64 | 121            | 69   | D                  | :O17/O44/O73/O77/O106:H18 Gp9 |  |
| 2-005-03                 | No  | < 1 yr | M   | no       | 4/23/09 | 3-month    | S3            | C3     | 2_005_03_S3_C3 | JNPR000000000               | SR5568354     | 5337905     | 50.63 | 168            | 2178 | B1                 | O81:H27                       |  |
| 2-005-03                 | No  | < 1 yr | M   | no       | 7/15/09 | 6-month    | S4            | C1     | 2_005_03_S4_C1 | JNPS000000000               | SR5568134     | 5266830     | 50.72 | 235            | 43   | A                  | NT:H10                        |  |
| 2-005-03                 | No  | < 1 yr | M   | no       | 7/15/09 | 6-month    | S4            | C2     | 2_005_03_S4_C2 | JJLN000000000               | SR5568239     | 5200769     | 50.68 | 284            | 452  | B2                 | O81:H27                       |  |
| 2-005-03                 | No  | < 1 yr | M   | no       | 7/15/09 | 6-month    | S4            | C3     | 2_005_03_S4_C3 | JJLJ000000000               | SR5568341     | 5246595     | 50.71 | 241            | 452  | B2                 | O81:H27                       |  |
| 2-011-08                 | No  | 2 yrs  | F   | no       | 1/23/09 | baseline   | S1            | C1     | 2_011_08_S1_C1 | JMGQ000000000               | SR5568305     | 5331782     | 50.21 | 125            | 485  | cryptic            | Novel3:H45                    |  |
| 2-011-08                 | No  | 2 yrs  | F   | no       | 1/23/09 | baseline   | S1            | C2     | 2_011_08_S1_C2 | JJMB000000000               | SR5568306     | 5278747     | 50.64 | 146            | 3018 | E                  | NT:H41                        |  |
| 2-011-08                 | No  | 2 yrs  | F   | no       | 1/23/09 | baseline   | S1            | C3     | 2_011_08_S1_C3 | JJNA000000000               | SR5568205     | 4965207     | 50.89 | 169            | 165  | A                  | NT:H2                         |  |
| 2-011-08                 | No  | 2 yrs  | F   | no       | 4/23/09 | 3-month    | S3            | C1     | 2_011_08_S3_C1 | JJNB000000000               | SR5568026     | 5163084     | 50.68 | 159            | 10   | A                  | O128ab/ac:H10                 |  |
| 2-011-08                 | No  | 2 yrs  | F   | no       | 4/23/09 | 3-month    | S3            | C2     | 2_011_08_S3_C2 | JMGU000000000               | SR5568369     | 5301316     | 50.7  | 264            | 43   | A                  | NT:H10                        |  |
| 2-011-08                 | No  | 2 yrs  | F   | no       | 4/23/09 | 3-month    | S3            | C3     | 2_011_08_S3_C3 | JMGV000000000               | SR5568194     | 5146593     | 50.65 | 162            | 10   | A                  | O128ab/ac:H10                 |  |
| 2-011-08                 | No  | 2 yrs  | F   | no       | 7/15/09 | 6-month    | S4            | C1     | 2_011_08_S4_C1 | JJNC000000000               | SR5568360     | 4839184     | 50.91 | 183            | 216  | A                  | O3:H4                         |  |
| 2-011-08                 | No  | 2 yrs  | F   | no       | 7/15/09 | 6-month    | S4            | C3     | 2_011_08_S4_C3 | JJND000000000               | SR5568021     | 4815027     | 50.95 | 173            | 216  | A                  | O3:H4                         |  |
| 2-052-05                 | No  | 1 yr   | F   | yes      | 1/23/09 | baseline   | S1            | C1     | 2_052_05_S1_C1 | JMGR000000000               | SR5568241     | 5270362     | 50.57 | 162            | 5257 | B1                 | O8:H12                        |  |
| 2-052-05                 | No  | 1 yr   | F   | yes      | 1/23/09 | baseline   | S1            | C3     | 2_052_05_S1_C3 | JJNE000000000               | SR5568275     | 5231155     | 50.57 | 148            | 1286 | B1                 | O71:H32                       |  |
| 2-052-05                 | No  | 1 yr   | F   | no       | 4/23/09 | 3-month    | S3            | C1     | 2_052_05_S3_C1 | JJNF000000000               | SR5568199     | 4955132     | 50.64 | 135            | 1286 | A                  | O71:H32                       |  |

| Subject and Isolate Data |     |        |     |          |         |            |               |        | Genome assembly information |               |               |             |       | Strain information |      |            |                              |
|--------------------------|-----|--------|-----|----------|---------|------------|---------------|--------|-----------------------------|---------------|---------------|-------------|-------|--------------------|------|------------|------------------------------|
| Subject ID               | MDA | Age    | Sex | Diarrhea | Date    | Time point | Time point ID | Colony | Assembly ID                 | WGS Accession | SRA Accession | Genome size | %GC   | No. of contigs     | MLST | Phylogroup | Serotype                     |
| 2-052-05                 | No  | 1 yr   | F   | no       | 4/23/09 | 3-month    | S3            | C2     | 2_052_05_S3_C2              | JOSJ000000000 | SRSS572007    | 5018629     | 50.64 | 100                | 1286 | A          | O71:H32                      |
| 2-052-05                 | No  | 1 yr   | F   | no       | 4/23/09 | 3-month    | S3            | C3     | 2_052_05_S3_C3              | JNOZ000000000 | SRSS568039    | 4926400     | 50.62 | 117                | 1286 | A          | O71:H32                      |
| 2-052-05                 | No  | 1 yr   | F   | no       | 7/15/09 | 6-month    | S4            | C1     | 2_052_05_S4_C1              | JNNG000000000 | SRSS568206    | 5304552     | 50.74 | 179                | 452  | B2         | O81:H7                       |
| 2-052-05                 | No  | 1 yr   | F   | no       | 7/15/09 | 6-month    | S4            | C2     | 2_052_05_S4_C2              | JNPA000000000 | SRSS568325    | 5287681     | 50.56 | 105                | 1891 | B1         | O121:H7                      |
| 2-052-05                 | No  | 1 yr   | F   | no       | 7/15/09 | 6-month    | S4            | C3     | 2_052_05_S4_C3              | JNPB000000000 | SRSS568355    | 4936995     | 50.91 | 155                | 10   | A          | O69:H32                      |
| 2-156-04                 | No  | 2 yrs  | M   | no       | 1/23/09 | baseline   | S1            | C3     | 2_156_04_S1_C3              | JNPE000000000 | SRSS568394    | 4967237     | 50.87 | 189                | 5279 | A          | O90/O127:H21/H36 Gp 4        |
| 2-156-04                 | No  | 2 yrs  | M   | no       | 4/23/09 | 3-month    | S3            | C1     | 2_156_04_S3_C1              | JNPF000000000 | SRSS568227    | 4986885     | 50.48 | 98                 | 469  | B1         | O32:H16                      |
| 2-156-04                 | No  | 2 yrs  | M   | no       | 4/23/09 | 3-month    | S3            | C2     | 2_156_04_S3_C2              | JNPK000000000 | SRSS568285    | 4981016     | 50.33 | 87                 | 3910 | A          | O8/O153var2:H33              |
| 2-156-04                 | No  | 2 yrs  | M   | no       | 4/23/09 | 3-month    | S3            | C3     | 2_156_04_S3_C3              | JNPG000000000 | SRSS568370    | 5239835     | 50.66 | 130                | 165  | A          | O80:H19                      |
| 2-156-04                 | No  | 2 yrs  | M   | no       | 7/15/09 | 6-month    | S4            | C1     | 2_156_04_S4_C1              | JNPJ000000000 | SRSS568225    | 4901577     | 51.03 | 164                | 216  | A          | O36/Novel3:H11/H34/H35       |
| 2-156-04                 | No  | 2 yrs  | M   | no       | 7/15/09 | 6-month    | S4            | C2     | 2_156_04_S4_C2              | JNQD000000000 | SRSS568393    | 5095777     | 50.89 | 215                | 401  | B1         | O36:H11/H35                  |
| 2-156-04                 | No  | 2 yrs  | M   | no       | 7/15/09 | 6-month    | S4            | C3     | 2_156_04_S4_C3              | JNQE000000000 | SRSS568366    | 4911937     | 50.91 | 183                | 216  | A          | O154:H4/H55                  |
| 2-177-06                 | No  | 1 yr   | F   | no       | 1/24/09 | baseline   | S1            | C1     | 2_177_06_S1_C1              | JNPH000000000 | SRSS568192    | 5236669     | 50.56 | 172                | 5257 | B1         | O8:H12                       |
| 2-177-06                 | No  | 1 yr   | F   | no       | 1/24/09 | baseline   | S1            | C2     | 2_177_06_S1_C2              | JNPL000000000 | SRSS568319    | 5292127     | 50.5  | 145                | 5257 | B1         | O8:H12                       |
| 2-177-06                 | No  | 1 yr   | F   | no       | 1/24/09 | baseline   | S1            | C3     | 2_177_06_S1_C3              | JNPM000000000 | SRSS568273    | 5232863     | 50.54 | 146                | 5257 | B1         | O8:H12                       |
| 2-177-06                 | No  | 1 yr   | F   | yes      | 4/24/09 | 3-month    | S3            | C1     | 2_177_06_S3_C1              | JNPI000000000 | SRSS568342    | 5153872     | 50.69 | 145                | 641  | B1         | Novel20:H10                  |
| 2-177-06                 | No  | 1 yr   | F   | yes      | 4/24/09 | 3-month    | S3            | C2     | 2_177_06_S3_C2              | JNQP000000000 | SRSS568137    | 5360304     | 50.59 | 181                | 5386 | A          | O8/O179:H10                  |
| 2-177-06                 | No  | 1 yr   | F   | yes      | 4/24/09 | 3-month    | S3            | C3     | 2_177_06_S3_C3              | JOSO000000000 | SRSS572008    | 5301549     | 50.59 | 167                | 5386 | A          | O8/O179:H10                  |
| 2-177-06                 | No  | 1 yr   | F   | no       | 7/16/09 | 6-month    | S4            | C1     | 2_177_06_S4_C1              | JNQG000000000 | SRSS568347    | 5144646     | 50.85 | 102                | 117  | B2         | O161:H4                      |
| 2-177-06                 | No  | 1 yr   | F   | no       | 7/16/09 | 6-month    | S4            | C2     | 2_177_06_S4_C2              | JNPN000000000 | SRSS568078    | 5060232     | 50.86 | 113                | 2522 | B1         | O153var1:H12                 |
| 2-177-06                 | No  | 1 yr   | F   | no       | 7/16/09 | 6-month    | S4            | C3     | 2_177_06_S4_C3              | JNPZ000000000 | SRSS568356    | 5570876     | 50.63 | 191                | 678  | B1         | O104:H4                      |
| 2-210-07                 | No  | 2 yrs  | M   | no       | 1/23/09 | baseline   | S1            | C2     | 2_210_07_S1_C2              | JNPP000000000 | SRSS568228    | 5155557     | 50.79 | 198                | 1415 | A          | O185:NT                      |
| 2-210-07                 | No  | 2 yrs  | M   | no       | 1/23/09 | baseline   | S1            | C3     | 2_210_07_S1_C3              | JNPO000000000 | SRSS568136    | 5214871     | 50.88 | 169                | 1415 | A          | O185:NT                      |
| 2-210-07                 | No  | 2 yrs  | M   | no       | 4/23/09 | 3-month    | S3            | C1     | 2_210_07_S3_C1              | JNQH000000000 | SRSS568395    | 4709037     | 50.84 | 115                | 744  | A          | O89:H9                       |
| 2-210-07                 | No  | 2 yrs  | M   | no       | 4/23/09 | 3-month    | S3            | C2     | 2_210_07_S3_C2              | JNPP000000000 | SRSS568061    | 5169282     | 50.74 | 243                | 40   | B1         | O112ab:H21                   |
| 2-210-07                 | No  | 2 yrs  | M   | no       | 4/23/09 | 3-month    | S3            | C3     | 2_210_07_S3_C3              | JNQA000000000 | SRSS568337    | 5394252     | 50.53 | 341                | 378  | A          | O89/O101/O162:H33 Gp15       |
| 2-210-07                 | No  | 2 yrs  | M   | no       | 7/15/09 | 6-month    | S4            | C1     | 2_210_07_S4_C1              | JNPW000000000 | SRSS568378    | 4974306     | 50.43 | 85                 | 410  | B1         | O8:H9                        |
| 2-210-07                 | No  | 2 yrs  | M   | no       | 7/15/09 | 6-month    | S4            | C2     | 2_210_07_S4_C2              | JNQI000000000 | SRSS568283    | 4923516     | 50.93 | 187                | 216  | A          | O154:H4/H55                  |
| 2-210-07                 | No  | 2 yrs  | M   | no       | 7/15/09 | 6-month    | S4            | C3     | 2_210_07_S4_C3              | JNQJ000000000 | SRSS568079    | 4911172     | 50.93 | 185                | 216  | A          | O154:H4/H55                  |
| 2-222-05                 | No  | < 1 yr | F   | no       | 1/23/09 | baseline   | S1            | C1     | 2_222_05_S1_C1              | JNQK000000000 | SRSS568151    | 4965006     | 50.53 | 108                | 5376 | B1         | O39:H12                      |
| 2-222-05                 | No  | < 1 yr | F   | no       | 1/23/09 | baseline   | S1            | C2     | 2_222_05_S1_C2              | JNQL000000000 | SRSS568246    | 4931696     | 50.56 | 106                | 5376 | B1         | O39:H12                      |
| 2-222-05                 | No  | < 1 yr | F   | no       | 1/23/09 | baseline   | S1            | C3     | 2_222_05_S1_C3              | JNQM000000000 | SRSS568320    | 4943872     | 50.55 | 105                | 5376 | B1         | O39:H12                      |
| 2-222-05                 | No  | < 1 yr | F   | yes      | 4/23/09 | 3-month    | S3            | C1     | 2_222_05_S3_C1              | JOSM000000000 | SRSS572010    | 5479430     | 50.74 | 269                | 10   | A          | O15:H4                       |
| 2-222-05                 | No  | < 1 yr | F   | yes      | 4/23/09 | 3-month    | S3            | C2     | 2_222_05_S3_C2              | JOSN000000000 | SRSS572012    | 5388923     | 50.78 | 245                | 10   | A          | O15:H4                       |
| 2-222-05                 | No  | < 1 yr | F   | yes      | 4/23/09 | 3-month    | S3            | C3     | 2_222_05_S3_C3              | JNQN000000000 | SRSS568029    | 5471232     | 50.74 | 211                | 10   | A          | O15:H4                       |
| 2-222-05                 | No  | < 1 yr | F   | no       | 7/15/09 | 6-month    | S4            | C1     | 2_222_05_S4_C1              | JORR000000000 | SRSS568281    | 4862082     | 50.95 | 161                | 216  | A          | O154:H4/H55                  |
| 2-222-05                 | No  | < 1 yr | F   | no       | 7/15/09 | 6-month    | S4            | C2     | 2_222_05_S4_C2              | JNQO000000000 | SRSS568286    | 5257015     | 50.4  | 174                | 484  | A          | O7:H4                        |
| 2-222-05                 | No  | < 1 yr | F   | no       | 7/15/09 | 6-month    | S4            | C3     | 2_222_05_S4_C3              | JOSP000000000 | SRSS572028    | 5239725     | 50.61 | 200                | 484  | A          | O7:H4                        |
| 2-316-03                 | No  | < 1 yr | F   | no       | 1/23/09 | baseline   | S1            | C1     | 2_316_03_S1_C1              | JOMW000000000 | SRSS572029    | 5396154     | 50.68 | 196                | 69   | B2         | O17/O44/O73/O77/O106:H18 Gp9 |
| 2-316-03                 | No  | < 1 yr | F   | no       | 1/23/09 | baseline   | S1            | C2     | 2_316_03_S1_C2              | JOMX000000000 | SRSS572032    | 5341596     | 50.65 | 162                | 69   | B2         | O17/O44/O73/O77/O106:H18 Gp9 |
| 2-316-03                 | No  | < 1 yr | F   | yes      | 4/24/09 | 3-month    | S3            | C1     | 2_316_03_S3_C1              | JNQP000000000 | SRSS568274    | 5075779     | 50.97 | 151                | 761  | A          | O21:H25                      |
| 2-316-03                 | No  | < 1 yr | F   | yes      | 4/24/09 | 3-month    | S3            | C2     | 2_316_03_S3_C2              | JNQQ000000000 | SRSS568153    | 4983084     | 50.76 | 116                | 155  | B1         | O9/Novel14:H21               |
| 2-316-03                 | No  | < 1 yr | F   | yes      | 4/24/09 | 3-month    | S3            | C3     | 2_316_03_S3_C3              | JNQR000000000 | SRSS568271    | 4815859     | 50.8  | 119                | 155  | B1         | O9:H21                       |
| 2-316-03                 | No  | < 1 yr | F   | no       | 7/15/09 | 6-month    | S4            | C1     | 2_316_03_S4_C1              | JNQS000000000 | SRSS568338    | 5226094     | 50.57 | 154                | 394  | B2         | O17/O44/O73/O77/O106:H18 Gp9 |
| 2-316-03                 | No  | < 1 yr | F   | no       | 7/15/09 | 6-month    | S4            | C2     | 2_316_03_S4_C2              | JNQT000000000 | SRSS568207    | 5332986     | 50.62 | 210                | 10   | A          | O107/O117:H10 Gp8            |
| 2-316-03                 | No  | < 1 yr | F   | no       | 7/15/09 | 6-month    | S4            | C3     | 2_316_03_S4_C3              | JNQU000000000 | SRSS568146    | 5427639     | 50.68 | 155                | 131  | B2         | O18ab/ac:H4 Gp12             |
| 2-427-07                 | No  | 2 yrs  | M   | no       | 1/23/09 | baseline   | S1            | C1     | 2_427_07_S1_C1              | JNQV000000000 | SRSS568255    | 4710651     | 50.66 | 139                | 155  | B1         | O9/O112ac:H51                |
| 2-427-07                 | No  | 2 yrs  | M   | no       | 1/23/09 | baseline   | S1            | C2     | 2_427_07_S1_C2              | JNQW000000000 | SRSS568160    | 4796164     | 50.6  | 135                | 155  | B1         | O9/O112ac:H21/H51            |
| 2-427-07                 | No  | 2 yrs  | M   | no       | 1/23/09 | baseline   | S1            | C3     | 2_427_07_S1_C3              | JNJR000000000 | SRSS568190    | 5196316     | 50.69 | 145                | 155  | B1         | O9/O103/O112ac:H16/H21       |
| 2-427-07                 | No  | 2 yrs  | M   | no       | 4/23/09 | 3-month    | S3            | C1     | 2_427_07_S3_C1              | JNQX000000000 | SRSS568157    | 5287373     | 50.73 | 120                | 2175 | B1         | O103:H16                     |
| 2-427-07                 | No  | 2 yrs  | M   | no       | 4/23/09 | 3-month    | S3            | C3     | 2_427_07_S3_C3              | JNQY000000000 | SRSS568162    | 4875912     | 50.7  | 88                 | 2175 | B1         | O103:H16                     |
| 2-427-07                 | No  | 2 yrs  | M   | no       | 7/15/09 | 6-month    | S4            | C1     | 2_427_07_S4_C1              | JNQZ000000000 | SRSS568339    | 5248071     | 50.66 | 194                | 382  | A          | NT:H5                        |
| 2-427-07                 | No  | 2 yrs  | M   | no       | 7/15/09 | 6-month    | S4            | C2     | 2_427_07_S4_C2              | JNRA000000000 | SRSS568141    | 5560615     | 50.71 | 141                | 131  | B2         | O25/Novel31:H4               |
| 2-427-07                 | No  | 2 yrs  | M   | no       | 7/15/09 | 6-month    | S4            | C3     | 2_427_07_S4_C3              | JOMY000000000 | SRSS572033    | 5732927     | 50.57 | 227                | 223  | B1         | O132:H16                     |
| 2-460-02                 | No  | 1 yr   | M   | yes      | 1/23/09 | baseline   | S1            | C1     | 2_460_02_S1_C1              | JOSS000000000 | SRSS572036    | 5607136     | 50.6  | 197                | 223  | B1         | O132:H16                     |
| 2-460-02                 | No  | 1 yr   | M   | yes      | 1/23/09 | baseline   | S1            | C2     | 2_460_02_S1_C2              | JOSU000000000 | SRSS572037    | 5659114     | 50.73 | 172                | 131  | B2         | O25/O31:H4                   |
| 2-460-02                 | No  | 1 yr   | M   | yes      | 1/23/09 | baseline   | S1            | C3     | 2_460_02_S1_C3              | JOMZ000000000 | SRSS572038    | 5544292     | 50.69 | 123                | 131  | B2         | O25/Novel31:H4               |
| 2-460-02                 | No  | 1 yr   | M   | no       | 4/23/09 | 3-month    | S3            | C1     | 2_460_02_S3_C1              | JNRR000000000 | SRSS568278    | 5475690     | 50.79 | 250                | 3281 | A          | O111:H12                     |
| 2-460-02                 | No  | 1 yr   | M   | no       | 4/23/09 | 3-month    | S3            | C2     | 2_460_02_S3_C2              | JNRC000000000 | SRSS568261    | 5465378     | 50.76 | 293                | 3281 | A          | O111:H12                     |
| 2-460-02                 | No  | 1 yr   | M   | no       | 4/23/09 | 3-month    | S3            | C3     | 2_460_02_S3_C3              | JNRR000000000 | SRSS568077    | 5367092     | 50.91 | 299                | 3281 | A          | O111:H12                     |
| 2-460-02                 | No  | 1 yr   | M   | no       | 7/15/09 | 6-month    | S4            | C1     | 2_460_02_S4_C1              | JONA000000000 | SRSS572039    | 5541966     | 50.64 | 174                | 43   | A          | O6:H10                       |
| 2-460-02                 | No  | 1 yr   | M   | no       | 7/15/09 | 6-month    | S4            | C2     | 2_460_02_S4_C2              | JNRE000000000 | SRSS568371    | 5346503     | 50.54 | 175                | 43   | A          | O6:H10                       |

| Subject and Isolate Data |     |        |     |          |         |            |               |        | Genome assembly information |               |               |             |       | Strain information |      |            |                        |
|--------------------------|-----|--------|-----|----------|---------|------------|---------------|--------|-----------------------------|---------------|---------------|-------------|-------|--------------------|------|------------|------------------------|
| Subject ID               | MDA | Age    | Sex | Diarrhea | Date    | Time point | Time point ID | Colony | Assembly ID                 | WGS Accession | SRA Accession | Genome size | %GC   | No. of contigs     | MLST | Phylogroup | Serotype               |
| 2-460-02                 | No  | 1 yr   | M   | no       | 7/15/09 | 6-month    | S4            | C3     | 2_460_02_S4_C3              | JNRF000000000 | SRSS568391    | 5345933     | 50.55 | 172                | 43   | A          | O6:H10                 |
| 2-474-04                 | No  | 2 yrs  | M   | no       | 1/24/09 | baseline   | S1            | C1     | 2_474_04_S1_C1              | JNRG000000000 | SRSS568268    | 5124973     | 50.91 | 201                | 1415 | A          | O76:H34                |
| 2-474-04                 | No  | 2 yrs  | M   | no       | 1/24/09 | baseline   | S1            | C2     | 2_474_04_S1_C2              | JNRK000000000 | SRSS568170    | 4925970     | 50.85 | 143                | 226  | A          | O85:H10                |
| 2-474-04                 | No  | 2 yrs  | M   | no       | 4/24/09 | 3-month    | S3            | C1     | 2_474_04_S3_C1              | JNRH000000000 | SRSS568280    | 5446772     | 50.68 | 333                | 43   | A          | NT:H10                 |
| 2-474-04                 | No  | 2 yrs  | M   | no       | 4/24/09 | 3-month    | S3            | C2     | 2_474_04_S3_C2              | JNRI000000000 | SRSS568358    | 5362630     | 50.7  | 248                | 43   | A          | NT:H10                 |
| 2-474-04                 | No  | 2 yrs  | M   | no       | 4/24/09 | 3-month    | S3            | C3     | 2_474_04_S3_C3              | JNRL000000000 | SRSS568377    | 5448064     | 50.7  | 308                | 43   | A          | NT:H10                 |
| 2-474-04                 | No  | 2 yrs  | M   | no       | 7/16/09 | 6-month    | S4            | C1     | 2_474_04_S4_C1              | JOSL000000000 | SRSS568075    | 5039270     | 50.8  | 94                 | 1125 | B1         | O139:H19               |
| 2-474-04                 | No  | 2 yrs  | M   | no       | 7/16/09 | 6-month    | S4            | C2     | 2_474_04_S4_C2              | JNRM000000000 | SRSS568361    | 5044800     | 50.77 | 87                 | 1125 | B1         | O139:H19               |
| 2-474-04                 | No  | 2 yrs  | M   | no       | 7/16/09 | 6-month    | S4            | C3     | 2_474_04_S4_C3              | JNRO000000000 | SRSS568373    | 5028064     | 50.78 | 93                 | 1125 | B1         | O139:H19               |
| 3-020-07                 | Yes | < 1 yr | F   | yes      | 1/16/09 | baseline   | S1            | C1     | 3_020_07_S1_C1              | JNRO000000000 | SRSS568135    | 5091775     | 50.82 | 177                | 1139 | A          | O8:H9                  |
| 3-020-07                 | Yes | < 1 yr | F   | yes      | 1/16/09 | baseline   | S1            | C2     | 3_020_07_S1_C2              | JNRP000000000 | SRSS568201    | 5032286     | 50.83 | 121                | 1139 | A          | O8:H9                  |
| 3-020-07                 | Yes | < 1 yr | F   | yes      | 1/16/09 | baseline   | S1            | C3     | 3_020_07_S1_C3              | JNRQ000000000 | SRSS568390    | 5070287     | 50.78 | 155                | 1139 | A          | O8:H9                  |
| 3-020-07                 | Yes | < 1 yr | F   | no       | 4/16/09 | 3-month    | S3            | C1     | 3_020_07_S3_C1              | JNRR000000000 | SRSS568049    | 5514688     | 50.53 | 192                | 43   | A          | O6:H10                 |
| 3-020-07                 | Yes | < 1 yr | F   | no       | 4/16/09 | 3-month    | S3            | C2     | 3_020_07_S3_C2              | JONB000000000 | SRSS572096    | 5633558     | 50.57 | 250                | 43   | A          | O6:H10                 |
| 3-020-07                 | Yes | < 1 yr | F   | no       | 7/8/09  | 6-month    | S4            | C1     | 3_020_07_S4_C1              | JONC000000000 | SRSS572099    | 5691481     | 50.64 | 129                | 131  | B2         | O18ab/ac:H4 Gp12       |
| 3-020-07                 | Yes | < 1 yr | F   | no       | 7/8/09  | 6-month    | S4            | C2     | 3_020_07_S4_C2              | JNRS000000000 | SRSS568247    | 5260928     | 50.34 | 191                | 5617 | B1         | O131:H8                |
| 3-020-07                 | Yes | < 1 yr | F   | no       | 7/8/09  | 6-month    | S4            | C3     | 3_020_07_S4_C3              | JNRT000000000 | SRSS568235    | 5298996     | 50.38 | 162                | 5617 | B1         | O131:H8                |
| 3-073-06                 | Yes | 2 yrs  | M   | no       | 1/17/09 | baseline   | S1            | C1     | 3_073_06_S1_C1              | JNRU000000000 | SRSS568208    | 4945389     | 50.56 | 82                 | 4554 | B2         | O157:H39               |
| 3-073-06                 | Yes | 2 yrs  | M   | no       | 1/17/09 | baseline   | S1            | C2     | 3_073_06_S1_C2              | JNRY000000000 | SRSS568272    | 5248248     | 50.93 | 274                | 10   | A          | O29:H4                 |
| 3-073-06                 | Yes | 2 yrs  | M   | no       | 4/17/09 | 3-month    | S3            | C1     | 3_073_06_S3_C1              | JNRW000000000 | SRSS568163    | 5180914     | 50.77 | 223                | 43   | A          | NT:H10                 |
| 3-073-06                 | Yes | 2 yrs  | M   | no       | 4/17/09 | 3-month    | S3            | C2     | 3_073_06_S3_C2              | JNXX000000000 | SRSS568372    | 5256796     | 50.64 | 226                | 43   | A          | NT:H10                 |
| 3-073-06                 | Yes | 2 yrs  | M   | no       | 7/9/09  | 6-month    | S4            | C1     | 3_073_06_S4_C1              | JNMT000000000 | SRSS568203    | 5408383     | 50.79 | 252                | 1178 | A          | O130:H26               |
| 3-073-06                 | Yes | 2 yrs  | M   | no       | 7/9/09  | 6-month    | S4            | C2     | 3_073_06_S4_C2              | JNRY000000000 | SRSS568276    | 4831902     | 50.83 | 112                | 5474 | B1         | Onovel4:H10            |
| 3-073-06                 | Yes | 2 yrs  | M   | no       | 7/9/09  | 6-month    | S4            | C3     | 3_073_06_S4_C3              | JNRR000000000 | SRSS568007    | 5361656     | 50.81 | 226                | 1178 | A          | O130:H26               |
| 3-105-05                 | Yes | 1 yr   | F   | yes      | 1/17/09 | baseline   | S1            | C1     | 3_105_05_S1_C1              | JNLZ000000000 | SRSS568322    | 5152314     | 50.99 | 188                | 757  | A          | NT:H20                 |
| 3-105-05                 | Yes | 1 yr   | F   | yes      | 1/17/09 | baseline   | S1            | C2     | 3_105_05_S1_C2              | JNSA000000000 | SRSS568232    | 5048264     | 50.98 | 231                | 206  | A          | O60:H5                 |
| 3-105-05                 | Yes | 1 yr   | F   | yes      | 1/17/09 | baseline   | S1            | C3     | 3_105_05_S1_C3              | JNSB000000000 | SRSS568256    | 5239307     | 51.04 | 187                | 757  | A          | NT:H20                 |
| 3-105-05                 | Yes | 1 yr   | F   | no       | 4/17/09 | 3-month    | S3            | C1     | 3_105_05_S3_C1              | JNMA000000000 | SRSS568307    | 5117966     | 50.54 | 182                | 10   | A          | O78:H2                 |
| 3-105-05                 | Yes | 1 yr   | F   | no       | 4/17/09 | 3-month    | S3            | C2     | 3_105_05_S3_C2              | JNMB000000000 | SRSS568166    | 5097926     | 50.56 | 179                | 10   | A          | O78:H2                 |
| 3-105-05                 | Yes | 1 yr   | F   | no       | 4/17/09 | 3-month    | S3            | C3     | 3_105_05_S3_C3              | JNMC000000000 | SRSS568321    | 4995834     | 50.81 | 200                | 2172 | A          | O9:H4                  |
| 3-105-05                 | Yes | 1 yr   | F   | no       | 7/9/09  | 6-month    | S4            | C1     | 3_105_05_S4_C1              | JNML000000000 | SRSS568365    | 4929019     | 50.81 | 85                 | 227  | A          | O89/O101/O162:H10 Gp15 |
| 3-105-05                 | Yes | 1 yr   | F   | no       | 7/9/09  | 6-month    | S4            | C2     | 3_105_05_S4_C2              | JNMC000000000 | SRSS568059    | 5353813     | 50.4  | 116                | 12   | B2         | O18ab/ac:H5            |
| 3-105-05                 | Yes | 1 yr   | F   | no       | 7/9/09  | 6-month    | S4            | C3     | 3_105_05_S4_C3              | JNMD000000000 | SRSS568389    | 5098282     | 50.94 | 242                | 1114 | A          | O35:H26                |
| 3-267-03                 | Yes | 1 yr   | F   | yes      | 1/16/09 | baseline   | S1            | C1     | 3_267_03_S1_C1              | JNMP000000000 | SRSS568324    | 5453130     | 50.74 | 236                | 5251 | B1         | O128:H8                |
| 3-267-03                 | Yes | 1 yr   | F   | yes      | 1/16/09 | baseline   | S1            | C2     | 3_267_03_S1_C2              | JNMQ000000000 | SRSS568375    | 5115347     | 50.54 | 87                 | 3056 | D          | O51:H42                |
| 3-267-03                 | Yes | 1 yr   | F   | yes      | 1/16/09 | baseline   | S1            | C3     | 3_267_03_S1_C3              | JNMP000000000 | SRSS568030    | 5313998     | 50.71 | 219                | 5251 | B1         | O128:H8                |
| 3-267-03                 | Yes | 1 yr   | F   | no       | 4/16/09 | 3-month    | S3            | C1     | 3_267_03_S3_C1              | JNMF000000000 | SRSS568381    | 5133769     | 50.79 | 180                | 10   | A          | NT:H16                 |
| 3-267-03                 | Yes | 1 yr   | F   | no       | 4/16/09 | 3-month    | S3            | C2     | 3_267_03_S3_C2              | JNMM000000000 | SRSS568204    | 4850588     | 50.71 | 79                 | 101  | B1         | O153var1:H2            |
| 3-267-03                 | Yes | 1 yr   | F   | no       | 7/8/09  | 6-month    | S4            | C1     | 3_267_03_S4_C1              | JOND000000000 | SRSS572276    | 5647831     | 50.63 | 238                | 223  | B1         | O132:H16               |
| 3-267-03                 | Yes | 1 yr   | F   | no       | 7/8/09  | 6-month    | S4            | C2     | 3_267_03_S4_C2              | JNMR000000000 | SRSS568333    | 5390559     | 50.5  | 185                | 5285 | B1         | O163:H19               |
| 3-373-03                 | Yes | < 1 yr | F   | no       | 1/16/09 | baseline   | S1            | C1     | 3_373_03_S1_C1              | JNMY000000000 | SRSS568250    | 5089359     | 50.84 | 152                | 5293 | A          | O60:H5                 |
| 3-373-03                 | Yes | < 1 yr | F   | no       | 1/16/09 | baseline   | S1            | C2     | 3_373_03_S1_C2              | JNMI000000000 | SRSS568252    | 5066961     | 50.8  | 178                | 5293 | A          | O60:H5                 |
| 3-373-03                 | Yes | < 1 yr | F   | no       | 1/16/09 | baseline   | S1            | C3     | 3_373_03_S1_C3              | JNMY000000000 | SRSS568251    | 5131811     | 50.88 | 171                | 5293 | A          | O60:H5                 |
| 3-373-03                 | Yes | < 1 yr | F   | no       | 4/16/09 | 3-month    | S3            | C1     | 3_373_03_S3_C1              | JNMG000000000 | SRSS568349    | 4627215     | 50.77 | 117                | 48   | A          | O9:H11                 |
| 3-373-03                 | Yes | < 1 yr | F   | no       | 4/16/09 | 3-month    | S3            | C2     | 3_373_03_S3_C2              | JNMQ000000000 | SRSS568242    | 4808501     | 50.78 | 82                 | 10   | A          | O10:H40                |
| 3-373-03                 | Yes | < 1 yr | F   | no       | 4/16/09 | 3-month    | S3            | C3     | 3_373_03_S3_C3              | JNMH000000000 | SRSS568143    | 4871839     | 50.8  | 107                | 10   | A          | O10:H40                |
| 3-373-03                 | Yes | < 1 yr | F   | no       | 7/8/09  | 6-month    | S4            | C1     | 3_373_03_S4_C1              | JNMM000000000 | SRSS568169    | 5294790     | 50.62 | 171                | 10   | A          | O16:H48                |
| 3-373-03                 | Yes | < 1 yr | F   | no       | 7/8/09  | 6-month    | S4            | C2     | 3_373_03_S4_C2              | JNMS000000000 | SRSS568020    | 5328850     | 50.58 | 203                | 10   | A          | O16:H48                |
| 3-373-03                 | Yes | < 1 yr | F   | no       | 7/8/09  | 6-month    | S4            | C3     | 3_373_03_S4_C3              | JOQL000000000 | SRSS568359    | 5294474     | 50.61 | 180                | 10   | A          | O16:H48                |
| 3-475-03                 | Yes | 1 yr   | M   | no       | 1/16/09 | baseline   | S1            | C1     | 3_475_03_S1_C1              | JNMI000000000 | SRSS568270    | 4789923     | 50.87 | 194                | 5372 | A          | O90/O127:H4 Gp 4       |
| 3-475-03                 | Yes | 1 yr   | M   | no       | 1/16/09 | baseline   | S1            | C2     | 3_475_03_S1_C2              | JOQC000000000 | SRSS568289    | 5512344     | 50.62 | 176                | 200  | B1         | O127:H27               |
| 3-475-03                 | Yes | 1 yr   | M   | no       | 4/16/09 | 3-month    | S3            | C1     | 3_475_03_S3_C1              | JOQD000000000 | SRSS568234    | 5275184     | 50.64 | 145                | 328  | B1         | O88:H25                |
| 3-475-03                 | Yes | 1 yr   | M   | no       | 4/16/09 | 3-month    | S3            | C2     | 3_475_03_S3_C2              | JOQE000000000 | SRSS568243    | 5448404     | 50.69 | 203                | 29   | B1         | O71:H8                 |
| 3-475-03                 | Yes | 1 yr   | M   | yes      | 7/8/09  | 6-month    | S4            | C1     | 3_475_03_S4_C1              | JNMM000000000 | SRSS568330    | 4929218     | 50.66 | 105                | 10   | A          | NT:H10                 |
| 3-475-03                 | Yes | 1 yr   | M   | yes      | 7/8/09  | 6-month    | S4            | C2     | 3_475_03_S4_C2              | JNMM000000000 | SRSS568302    | 5055047     | 51.6  | 170                | 757  | A          | NT:H20                 |
| 4-203-08                 | Yes | 1 yr   | M   | no       | 1/19/09 | baseline   | S1            | C1     | 4_203_08_S1_C1              | JNMY000000000 | SRSS568036    | 5270688     | 50.75 | 173                | 10   | A          | O107/O117:H10 Gp8      |
| 4-203-08                 | Yes | 1 yr   | M   | no       | 1/19/09 | baseline   | S1            | C2     | 4_203_08_S1_C2              | JOQF000000000 | SRSS568245    | 5325397     | 50.76 | 183                | 10   | A          | O107/O117:H10 Gp8      |
| 4-203-08                 | Yes | 1 yr   | M   | no       | 1/19/09 | baseline   | S1            | C3     | 4_203_08_S1_C3              | JOQG000000000 | SRSS568253    | 5302353     | 50.74 | 167                | 10   | A          | O107/O117:H10 Gp8      |
| 4-203-08                 | Yes | 1 yr   | M   | no       | 4/18/09 | 3-month    | S3            | C1     | 4_203_08_S3_C1              | JOQH000000000 | SRSS568060    | 5030989     | 50.53 | 171                | 5318 | A          | NT:H10                 |
| 4-203-08                 | Yes | 1 yr   | M   | no       | 4/18/09 | 3-month    | S3            | C2     | 4_203_08_S3_C2              | JOQI000000000 | SRSS568269    | 4760420     | 50.79 | 105                | 5518 | A          | O38:H26                |
| 4-203-08                 | Yes | 1 yr   | M   | no       | 4/18/09 | 3-month    | S3            | C3     | 4_203_08_S3_C3              | JOQH000000000 | SRSS568237    | 4777481     | 50.78 | 116                | 5518 | A          | O38:H26                |
| 4-203-08                 | Yes | 1 yr   | M   | no       | 7/10/09 | 6-month    | S4            | C2     | 4_203_08_S4_C2              | JOQJ000000000 | SRSS568195    | 5069922     | 50.6  | 172                | 5318 | A          | NT:H10                 |

| Subject and Isolate Data |     |        |     |          |         |            |               |        | Genome assembly information |               |               |             |       |                | Strain information |            |                              |
|--------------------------|-----|--------|-----|----------|---------|------------|---------------|--------|-----------------------------|---------------|---------------|-------------|-------|----------------|--------------------|------------|------------------------------|
| Subject ID               | MDA | Age    | Sex | Diarrhea | Date    | Time point | Time point ID | Colony | Assembly ID                 | WGS Accession | SRA Accession | Genome size | %GC   | No. of contigs | MLST               | Phylogroup | Serotype                     |
| 4-203-08                 | Yes | 1 yr   | M   | no       | 7/10/09 | 6-month    | S4            | C3     | 4_203_08_S4_C3              | JNMZ000000000 | SRSS568265    | 5007529     | 50.56 | 180            | 5318               | A          | NT:H10                       |
| 5-172-05                 | No  | < 1 yr | M   | yes      | 1/22/09 | baseline   | S1            | C3     | 5_172_05_S1_C3              | JOQS000000000 | SRSS568171    | 4853958     | 51.02 | 185            | 1421               | A          | NT:H45                       |
| 5-172-05                 | No  | < 1 yr | M   | no       | 4/22/09 | 3-month    | S3            | C1     | 5_172_05_S3_C1              | JOQQ000000000 | SRSS568363    | 5089646     | 50.59 | 181            | 5439               | A          | NT:H10                       |
| 5-172-05                 | No  | < 1 yr | M   | no       | 4/22/09 | 3-month    | S3            | C3     | 5_172_05_S3_C3              | JOQO000000000 | SRSS568364    | 5192502     | 50.79 | 193            | 206                | A          | O6:H5                        |
| 5-172-05                 | No  | < 1 yr | M   | yes      | 7/14/09 | 6-month    | S4            | C1     | 5_172_05_S4_C1              | JOQP000000000 | SRSS568287    | 5046870     | 50.48 | 113            | 10                 | A          | O99:H33                      |
| 5-172-05                 | No  | < 1 yr | M   | yes      | 7/14/09 | 6-month    | S4            | C2     | 5_172_05_S4_C2              | JOQN000000000 | SRSS568353    | 5060331     | 50.47 | 109            | 10                 | A          | O99:H33                      |
| 5-172-05                 | No  | < 1 yr | M   | yes      | 7/14/09 | 6-month    | S4            | C3     | 5_172_05_S4_C3              | JOQT000000000 | SRSS568323    | 5012574     | 50.5  | 111            | 10                 | A          | O99:H33                      |
| 5-366-08                 | No  | < 1 yr | F   | no       | 1/22/09 | baseline   | S1            | C1     | 5_366_08_S1_C1              | JOQU000000000 | SRSS568240    | 5446335     | 50.59 | 123            | 2914               | D          | O166:H15                     |
| 5-366-08                 | No  | < 1 yr | F   | no       | 1/22/09 | baseline   | S1            | C3     | 5_366_08_S1_C3              | JONE000000000 | SRSS572100    | 5440914     | 50.64 | 109            | 2914               | D          | O166:H15                     |
| 5-366-08                 | No  | < 1 yr | F   | no       | 4/22/09 | 3-month    | S3            | C1     | 5_366_08_S3_C1              | JOQY000000000 | SRSS568226    | 5331786     | 50.68 | 124            | 2                  | D          | O17/O44/O73/O77/O106:H18 Gp9 |
| 5-366-08                 | No  | < 1 yr | F   | no       | 4/22/09 | 3-month    | S3            | C2     | 5_366_08_S3_C2              | JOQW000000000 | SRSS568266    | 5404125     | 50.52 | 174            | 5285               | B1         | O163:H19                     |
| 5-366-08                 | No  | < 1 yr | F   | no       | 4/22/09 | 3-month    | S3            | C3     | 5_366_08_S3_C3              | JOQV000000000 | SRSS568138    | 5254175     | 50.71 | 109            | 2                  | D          | O17/O44/O73/O77/O106:H18 Gp9 |
| 5-366-08                 | No  | < 1 yr | F   | no       | 7/14/09 | 6-month    | S4            | C1     | 5_366_08_S4_C1              | JOST000000000 | SRSS572277    | 5645469     | 50.36 | 217            | 5793               | A          | O176:H33                     |
| 5-366-08                 | No  | < 1 yr | F   | no       | 7/14/09 | 6-month    | S4            | C2     | 5_366_08_S4_C2              | JOQM000000000 | SRSS568238    | 5215424     | 50.55 | 225            | 5348               | A          | O6:O16                       |
| 6-175-07                 | Yes | 1 yr   | M   | yes      | 1/15/09 | baseline   | S1            | C1     | 6_175_07_S1_C1              | JOQR000000000 | SRSS568288    | 4976991     | 50.69 | 102            | 583                | B2         | O63:H6                       |
| 6-175-07                 | Yes | 1 yr   | M   | yes      | 1/15/09 | baseline   | S1            | C2     | 6_175_07_S1_C2              | JOMS000000000 | SRSS568233    | 5311695     | 50.53 | 146            | 38                 | D          | O153var1:H2                  |
| 6-175-07                 | Yes | 1 yr   | M   | yes      | 1/15/09 | baseline   | S1            | C3     | 6_175_07_S1_C3              | JORL000000000 | SRSS568376    | 5362266     | 50.58 | 127            | 38                 | D          | O153var1:H2                  |
| 6-175-07                 | Yes | 1 yr   | M   | no       | 4/15/09 | 3-month    | S3            | C1     | 6_175_07_S3_C1              | JOQZ000000000 | SRSS568231    | 5237667     | 50.56 | 106            | 827                | B2         | O4:H40                       |
| 6-175-07                 | Yes | 1 yr   | M   | no       | 4/15/09 | 3-month    | S3            | C2     | 6_175_07_S3_C2              | JONF000000000 | SRSS572278    | 5672404     | 50.51 | 124            | 827                | B2         | O4:H40                       |
| 6-175-07                 | Yes | 1 yr   | M   | no       | 4/15/09 | 3-month    | S3            | C3     | 6_175_07_S3_C3              | JORA000000000 | SRSS568189    | 5370013     | 50.51 | 106            | 827                | B2         | O4:H40                       |
| 6-175-07                 | Yes | 1 yr   | M   | no       | 7/7/09  | 6-month    | S4            | C1     | 6_175_07_S4_C1              | JORB000000000 | SRSS568236    | 4778266     | 50.81 | 125            | 5518               | A          | O38:H26                      |
| 6-175-07                 | Yes | 1 yr   | M   | no       | 7/7/09  | 6-month    | S4            | C2     | 6_175_07_S4_C2              | JORC000000000 | SRSS568380    | 4731158     | 50.77 | 103            | 5518               | A          | O38:H26                      |
| 6-175-07                 | Yes | 1 yr   | M   | no       | 7/7/09  | 6-month    | S4            | C3     | 6_175_07_S4_C3              | JORK000000000 | SRSS568202    | 4811932     | 50.75 | 133            | 5518               | A          | O38:H26                      |
| 6-319-05                 | Yes | < 1 yr | M   | yes      | 1/15/09 | baseline   | S1            | C1     | 6_319_05_S1_C1              | JORT000000000 | SRSS568149    | 5228177     | 50.76 | 221            | 443                | B1         | O115:H5                      |
| 6-319-05                 | Yes | < 1 yr | M   | yes      | 1/15/09 | baseline   | S1            | C2     | 6_319_05_S1_C2              | JORD000000000 | SRSS568161    | 5166967     | 50.88 | 192            | unknown            | B1         | O115:H5                      |
| 6-319-05                 | Yes | < 1 yr | M   | yes      | 1/15/09 | baseline   | S1            | C3     | 6_319_05_S1_C3              | JORE000000000 | SRSS568374    | 5338618     | 50.83 | 220            | 443                | B1         | O115:H5                      |
| 6-319-05                 | Yes | < 1 yr | M   | no       | 4/15/09 | 3-month    | S3            | C1     | 6_319_05_S3_C1              | JORF000000000 | SRSS568346    | 5362601     | 50.48 | 113            | 827                | B2         | O4:H40                       |
| 6-319-05                 | Yes | < 1 yr | M   | no       | 4/15/09 | 3-month    | S3            | C2     | 6_319_05_S3_C2              | JORG000000000 | SRSS568334    | 5363959     | 50.54 | 129            | 827                | B2         | O4:H40                       |
| 6-319-05                 | Yes | < 1 yr | M   | no       | 4/15/09 | 3-month    | S3            | C3     | 6_319_05_S3_C3              | JORM000000000 | SRSS568257    | 5285772     | 50.57 | 103            | 827                | B2         | O4:H40                       |
| 6-319-05                 | Yes | < 1 yr | M   | no       | 7/7/09  | 6-month    | S4            | C2     | 6_319_05_S4_C2              | JORH000000000 | SRSS568282    | 5066643     | 50.78 | 209            | 5294               | A          | O58:H32                      |
| 6-319-05                 | Yes | < 1 yr | M   | no       | 7/7/09  | 6-month    | S4            | C3     | 6_319_05_S4_C3              | JORJ000000000 | SRSS568329    | 5209264     | 50.7  | 439            | 5294               | A          | O58:H32                      |
| 6-537-08                 | Yes | 1 yr   | F   | yes      | 1/15/09 | baseline   | S1            | C1     | 6_537_08_S1_C1              | JORI000000000 | SRSS568396    | 5286217     | 50.79 | 153            | 2332               | A          | O128ab/fac:H45               |
| 6-537-08                 | Yes | 1 yr   | F   | yes      | 1/15/09 | baseline   | S1            | C2     | 6_537_08_S1_C2              | JOSC000000000 | SRSS568335    | 5310824     | 50.77 | 160            | 2332               | A          | O128ab/fac:H45               |
| 6-537-08                 | Yes | 1 yr   | F   | yes      | 1/15/09 | baseline   | S1            | C3     | 6_537_08_S1_C3              | JOSF000000000 | SRSS568362    | 5325906     | 50.8  | 167            | 2332               | A          | O128ab/fac:H45               |
| 6-537-08                 | Yes | 1 yr   | F   | no       | 4/15/09 | 3-month    | S3            | C1     | 6_537_08_S3_C1              | JORP000000000 | SRSS568259    | 5168278     | 50.63 | 97             | 192                | B1         | O174:H7                      |
| 6-537-08                 | Yes | 1 yr   | F   | no       | 4/15/09 | 3-month    | S3            | C2     | 6_537_08_S3_C2              | JORX000000000 | SRSS568154    | 5160700     | 50.56 | 98             | 192                | B1         | O174:H7                      |
| 6-537-08                 | Yes | 1 yr   | F   | no       | 4/15/09 | 3-month    | S3            | C3     | 6_537_08_S3_C3              | JORQ000000000 | SRSS568303    | 5207327     | 50.57 | 99             | 192                | B1         | O174:H7                      |
| 6-537-08                 | Yes | 1 yr   | F   | no       | 7/7/09  | 6-month    | S4            | C1     | 6_537_08_S4_C1              | JORS000000000 | SRSS568357    | 4806027     | 50.8  | 129            | 5518               | A          | O38:H26                      |
| 6-537-08                 | Yes | 1 yr   | F   | no       | 7/7/09  | 6-month    | S4            | C2     | 6_537_08_S4_C2              | JOSG000000000 | SRSS568267    | 4789699     | 50.76 | 112            | 5518               | A          | O38:H26                      |
| 7-233-03                 | No  | 1 yr   | M   | yes      | 1/27/09 | baseline   | S1            | C2     | 7_233_03_S1_C2              | JORN000000000 | SRSS568014    | 4763538     | 50.86 | 84             | 5334               | A          | O8/O32:H10                   |
| 7-233-03                 | No  | 1 yr   | M   | yes      | 1/27/09 | baseline   | S1            | C3     | 7_233_03_S1_C3              | JORU000000000 | SRSS568398    | 4743985     | 50.84 | 72             | 5334               | A          | O8/O32:H10                   |
| 7-233-03                 | No  | 1 yr   | M   | no       | 4/28/09 | 3-month    | S3            | C1     | 7_233_03_S3_C1              | JORO000000000 | SRSS568316    | 5264612     | 50.69 | 140            | 10                 | A          | O128:H10                     |
| 7-233-03                 | No  | 1 yr   | M   | no       | 4/28/09 | 3-month    | S3            | C2     | 7_233_03_S3_C2              | JORY000000000 | SRSS568147    | 5260199     | 50.84 | 204            | 1178               | A          | O130:H26                     |
| 7-233-03                 | No  | 1 yr   | M   | no       | 4/28/09 | 3-month    | S3            | C3     | 7_233_03_S3_C3              | JORV000000000 | SRSS568336    | 4962459     | 50.72 | 172            | 10                 | A          | O128ab/fac:H10               |
| 7-233-03                 | No  | 1 yr   | M   | no       | 7/18/09 | 6-month    | S4            | C1     | 7_233_03_S4_C1              | JOSD000000000 | SRSS568387    | 4673739     | 50.92 | 90             | 10                 | A          | Onovel8:H32                  |
| 7-233-03                 | No  | 1 yr   | M   | no       | 7/18/09 | 6-month    | S4            | C2     | 7_233_03_S4_C2              | JORW000000000 | SRSS568277    | 4837509     | 50.61 | 83             | 4995               | A          | Onovel15:H16                 |
| 7-233-03                 | No  | 1 yr   | M   | no       | 7/18/09 | 6-month    | S4            | C3     | 7_233_03_S4_C3              | JOSE000000000 | SRSS568144    | 4641553     | 50.92 | 115            | 10                 | A          | Onovel8:H32                  |
| 8-415-05                 | No  | < 1 yr | F   | no       | 1/28/09 | baseline   | S1            | C1     | 8_415_05_S1_C1              | JORZ000000000 | SRSS568388    | 4819146     | 50.52 | 132            | 226                | A          | O8/O40:H4                    |
| 8-415-05                 | No  | < 1 yr | F   | no       | 1/28/09 | baseline   | S1            | C2     | 8_415_05_S1_C2              | JOSQ000000000 | SRSS568350    | 4914937     | 50.48 | 155            | 226                | A          | O8/O40:H4                    |
| 8-415-05                 | No  | < 1 yr | F   | no       | 4/30/09 | 3-month    | S3            | C1     | 8_415_05_S3_C1              | JOSB000000000 | SRSS568317    | 5340365     | 50.46 | 154            | 73                 | B2         | O6:H1/H12                    |
| 8-415-05                 | No  | < 1 yr | F   | no       | 4/30/09 | 3-month    | S3            | C2     | 8_415_05_S3_C2              | JOSI000000000 | SRSS568318    | 5290814     | 50.49 | 134            | 73                 | B2         | O6:H1/H12                    |
| 8-415-05                 | No  | < 1 yr | F   | no       | 4/30/09 | 3-month    | S3            | C3     | 8_415_05_S3_C3              | JOSA000000000 | SRSS568290    | 5306490     | 50.46 | 152            | 73                 | B2         | O6:H1/H12                    |
| 8-415-05                 | No  | < 1 yr | F   | no       | 7/20/09 | 6-month    | S4            | C1     | 8_415_05_S4_C1              | JOMT000000000 | SRSS568150    | 5275845     | 50.48 | 141            | 73                 | B2         | O6:H1/H12                    |
| 8-415-05                 | No  | < 1 yr | F   | no       | 7/20/09 | 6-month    | S4            | C2     | 8_415_05_S4_C2              | JOMU000000000 | SRSS568258    | 5245147     | 50.48 | 128            | unknown            | B2         | O6:H1/H12                    |
| 8-415-05                 | No  | < 1 yr | F   | no       | 7/20/09 | 6-month    | S4            | C3     | 8_415_05_S4_C3              | JOMV000000000 | SRSS568074    | 5329443     | 50.47 | 139            | 73                 | B2         | O6:H1/H12                    |
