# Supplementary material for: Temporal Variability of Escherichia coli Diversity in the Gastrointestinal Tracts of Tanzanian Children with and without Exposure to Antibiotics
Source: PubMed Central journal article supplement (PMC6222053; doi:10.1128/msphere.00558-18), 2018-11-07
Supplement: sph006182690st2.pdf [file sph006182690st2.pdf]

**Table S2: Reference genomes and corresponding pathotypes**

| Tree label         | Reference genomes                   | Pathotype/origin | Phylogroup | GenBank Accession |
|--------------------|-------------------------------------|------------------|------------|-------------------|
| E. coli E110019    | Escherichia coli E110019            | EPEC             | B1         | NZ_AAJW00000000.2 |
| E. coli E2348_69   | Escherichia coli O127:H6 E2348/69   | EPEC             | B2         | FM180568.1        |
| E. coli E24377A    | Escherichia coli E24377A            | ETEC             | B1         | NC_009801.1       |
| E. coli 53638      | Escherichia coli 53638              | EIEC             | A          | AAKB00000000.2    |
| E. coli 536        | Escherichia coli 536                | UPEC             | B2         | NC_008253.1       |
| E. coli 55989      | Escherichia coli 55989              | EAEC             | B1         | NC_011748.1       |
| E. coli ATCC 8739  | Escherichia coli ATCC 8739          | lab adapted      | A          | NC_010468.1       |
| E. coli B171       | Escherichia coli B171               | EPEC             | B1         | NZ_AAJX00000000.2 |
| E. coli B7A        | Escherichia coli B7A                | ETEC             | B1         | NZ_CP005998.1     |
| E. coli BL21       | Escherichia coli BL21               | lab adapted      | A          | NC_012947.1       |
| E. coli BW2952     | Escherichia coli BW2952             | lab adapted      | A          | NC_012759.1       |
| E. coli CFT073     | Escherichia coli CFT073             | UPEC             | B2         | AE014075.1        |
| E. coli E22        | Escherichia coli E22                | EPEC             | B1         | NZ_AAJV00000000.2 |
| E. coli H10407     | Escherichia coli H10407             | ETEC             | A          | NC_017633.1       |
| E. coli HS         | Escherichia coli HS                 | fecal isolate    | A          | NC_009800.1       |
| E. coli IAI1       | Escherichia coli IAI1               | fecal isolate    | B1         | NC_011741.1       |
| E. coli IAI39      | Escherichia coli IAI39              | ExPEC            | F          | NC_011750.1       |
| E. coli 11368      | Escherichia coli O26:H11 11368      | EHEC             | B1         | NC_013361.1       |
| E. coli O111 11128 | Escherichia coli O111 11128         | EHEC             | B1         | NC_013364.1       |
| E. coli EDL933     | Escherichia coli O157:H7 EDL933     | EHEC             | E          | NC_002655.2       |
| E. coli Sakai      | Escherichia coli O157:H7 str Sakai  | EHEC             | E          | NC_002695.1       |
| E. coli 042        | Escherichia coli O44:H18 042        | EAEC             | D          | FN554766.1        |
| E. coli CB9615     | Escherichia coli O55:H7 CB9615      | EPEC             | E          | NC_013941.1       |
| E. coli S88        | Escherichia coli O45:K1:H7 S88      | ExPEC            | B2         | NC_011742.1       |
| E. coli SE11       | Escherichia coli O152:H28 SE11      | fecal isolate    | B1         | NC_011415.1       |
| E. coli SMS 3 5    | Escherichia coli SMS 3-5            | environmental    | F          | CP000970.1        |
| E. coli TY 2482    | Escherichia coli O104:H4 TY-2482    | EHEC             | B1         | AFOG00000000.1    |
| E. coli UMN026     | Escherichia coli O17:K52:H18 UMN026 | ExPEC            | D          | NC_011751.1       |
| E. coli UTI89      | Escherichia coli UTI89              | UPEC             | B2         | NC_007946.1       |
| S. boydii 3083     | Shigella boydii 3083-94             | Shigella         | B1         | NC_010658.1       |
| S. dysenteriae     | Shigella dysenteriae                | Shigella         | E          | NC_007606.1       |
| S. flexneri 2A     | Shigella flexneri 2a                | Shigella         | B1         | NC_004741.1       |
| S. sonnei 046      | Shigella sonnei 046                 | Shigella         | B1         | NC_007384.1       |
