# Supplementary material for: Temporal Variability of Escherichia coli Diversity in the Gastrointestinal Tracts of Tanzanian Children with and without Exposure to Antibiotics
Source: PubMed Central journal article supplement (PMC6222053; doi:10.1128/msphere.00558-18), 2018-11-07
Supplement: sph006182690st3.pdf [file sph006182690st3.pdf]

**Table S3: Table of pairwise gene content comparisons for each individual showing the relatedness of genomes within and across clades.**

| Subject  | Total no. of clades | No. of clades with multiple isolates | No. of isolates in shared clades | <i>Genomes in shared clades</i> |                    | <i>Genomes in different clades</i> |                    |
|----------|---------------------|--------------------------------------|----------------------------------|---------------------------------|--------------------|------------------------------------|--------------------|
|          |                     |                                      |                                  | Average no. of variable genes   | Standard deviation | Average no. variable genes         | Standard deviation |
| 1_110_08 | 5                   | 3                                    | 7                                | 64.6                            | 18.6               | 2597.4                             | 381.1              |
| 1_176_05 | 4                   | 2                                    | 6                                | 142.7                           | 69.5               | 2549                               | 627.8              |
| 1_182_04 | 3                   | 3                                    | 9                                | 317.1                           | 435.9              | 2664.6                             | 432.9              |
| 1_250_04 | 3                   | 3                                    | 7                                | 78.4                            | 33.5               | 2708.1                             | 503.8              |
| 1_392_07 | 4                   | 3                                    | 7                                | 95.8                            | 73.3               | 2942.4                             | 298.3              |
| 2_005_03 | 5                   | 3                                    | 7                                | 68.2                            | 26.8               | 3170.8                             | 565.8              |
| 2_011_08 | 6                   | 2                                    | 4                                | 36.5                            | 14.8               | 2639.3                             | 436.1              |
| 2_052_05 | 5                   | 2                                    | 5                                | 99.5                            | 82.9               | 2781.5                             | 653.1              |
| 2_156_04 | 7                   | 0                                    | 0                                | N/A                             | N/A                | 2428.1                             | 433.7              |
| 2_177_06 | 6                   | 2                                    | 5                                | 99.3                            | 55.6               | 2450.3                             | 242.3              |
| 2_210_07 | 6                   | 2                                    | 4                                | 66                              | 58                 | 2288.3                             | 409.2              |
| 2_222_05 | 4                   | 3                                    | 8                                | 261.9                           | 335.9              | 2661.6                             | 186.5              |
| 2_316_03 | 6                   | 1                                    | 2                                | 42                              | N/A                | 2816.6                             | 611.6              |
| 2_427_07 | 5                   | 2                                    | 5                                | 628.8                           | 601.5              | 2501.4                             | 823.4              |
| 2_460_02 | 4                   | 3                                    | 8                                | 131.7                           | 106.9              | 2896                               | 725.4              |
| 2_474_04 | 4                   | 2                                    | 6                                | 107.7                           | 84                 | 2433.8                             | 328.5              |
| 3_020_07 | 4                   | 3                                    | 7                                | 79                              | 23.6               | 2653.1                             | 483.6              |
| 3_073_06 | 5                   | 2                                    | 4                                | 150.5                           | 92.6               | 2792.4                             | 455.8              |
| 3_105_05 | 7                   | 2                                    | 4                                | 86                              | 65.1               | 2545.6                             | 642.1              |
| 3_267_03 | 6                   | 1                                    | 2                                | 61                              | N/A                | 2566.8                             | 391.8              |
| 3_373_03 | 4                   | 3                                    | 8                                | 76                              | 32.8               | 2387.1                             | 252.2              |
| 3_475_03 | 6                   | 0                                    | 0                                | N/A                             | N/A                | 2676.2                             | 302.2              |
| 4_203_08 | 3                   | 3                                    | 8                                | 88.7                            | 69.6               | 2008.9                             | 255.9              |
| 5_172_05 | 4                   | 1                                    | 3                                | 156.7                           | 35.9               | 2010.2                             | 280.9              |
| 5_366_08 | 5                   | 2                                    | 4                                | 197                             | 69.3               | 3010.4                             | 210.3              |
| 6_175_07 | 4                   | 3                                    | 8                                | 227.6                           | 130.8              | 3045.9                             | 236.2              |
| 6_319_05 | 3                   | 3                                    | 8                                | 285.3                           | 172.5              | 2968.1                             | 589.4              |
| 6_537_08 | 3                   | 3                                    | 8                                | 158.9                           | 60.1               | 2444.4                             | 214.5              |
| 7_233_03 | 5                   | 3                                    | 6                                | 219                             | 177.8              | 1833.7                             | 377                |
| 8_415_05 | 2                   | 2                                    | 8                                | 114.3                           | 65.6               | 3399.6                             | 57.8               |
|          |                     |                                      | Mean                             | 147.9                           | 120.1              | 2629.1                             | 339.4              |
