# Supplementary material for: Temporal Variability of Escherichia coli Diversity in the Gastrointestinal Tracts of Tanzanian Children with and without Exposure to Antibiotics
Source: PubMed Central journal article supplement (PMC6222053; doi:10.1128/msphere.00558-18), 2018-11-07
Supplement: sph006182690st4.pdf [file sph006182690st4.pdf]

| Sample ID<br>(Subject ID_<br>Sample No._<br>Colony No.) | Phylogeny                  |                              |                                      | Phylogroup                      |                 |                                | MLST            |                                 |                 | Serotype                       |                 |                   | Resistance      |                 |                 |            |                | Virulence                     |                |            |                 |                                   |            |                 |                  |                               |                 |                  |  |
|---------------------------------------------------------|----------------------------|------------------------------|--------------------------------------|---------------------------------|-----------------|--------------------------------|-----------------|---------------------------------|-----------------|--------------------------------|-----------------|-------------------|-----------------|-----------------|-----------------|------------|----------------|-------------------------------|----------------|------------|-----------------|-----------------------------------|------------|-----------------|------------------|-------------------------------|-----------------|------------------|--|
|                                                         | No. clades w/in time point | No. clades across time point | No. clades shared across time points | No. phylogroups w/in time point | Like phylogeny? | No. phylogroups within subject | Like phylogeny? | No. phylogroups w/in time point | Like phylogeny? | No. phylogroups within subject | Like phylogeny? | No. per timepoint | Like phylogeny? | No. per subject | Like phylogeny? | No. clades | Like phylogeny | No. clades across time points | Like phylogeny | Superclade | No. superclades | No. superclades across time point | No. clades | Like phylogeny? | Like resistance? | No. clades across time points | Like phylogeny? | Like resistance? |  |
| 2_011_08_S3_C3                                          |                            |                              |                                      |                                 |                 |                                |                 |                                 |                 |                                |                 |                   |                 |                 |                 |            |                |                               |                | 2          |                 |                                   |            |                 |                  |                               |                 |                  |  |
| 2_011_08_S4_C1                                          | 1                          |                              |                                      | 1                               | n               |                                | 1               | y                               |                 |                                |                 | 2                 | n               |                 |                 | 1          | y              |                               |                | 1          | 1               |                                   | 1          | y               | y                |                               |                 |                  |  |
| 2_011_08_S4_C3                                          |                            |                              |                                      |                                 |                 |                                |                 |                                 |                 |                                |                 |                   |                 |                 |                 |            |                |                               |                | 1          |                 |                                   |            |                 |                  |                               |                 |                  |  |
| 2_052_05_S1_C1                                          | 1                          |                              |                                      | 1                               | y               |                                | 2               | n                               |                 |                                |                 | 2                 | n               |                 |                 | 2          | n              |                               |                | 2          | 1               |                                   | 1          | y               | n                |                               |                 |                  |  |
| 2_052_05_S1_C3                                          |                            |                              |                                      |                                 |                 |                                |                 |                                 |                 |                                |                 |                   |                 |                 |                 |            |                |                               |                | 2          |                 |                                   |            |                 |                  |                               |                 |                  |  |
| 2_052_05_S3_C1                                          | 1                          | 5                            | 0                                    | 1                               | y               | 3                              | n               | 1                               | y               | 5                              | y               | 1                 | y               | 5               | y               | 1          | y              | 4                             | y              | 1          | 1               | 2                                 | 1          | y               | y                | 5                             | n               | n                |  |
| 2_052_05_S3_C2                                          |                            |                              |                                      |                                 |                 |                                |                 |                                 |                 |                                |                 |                   |                 |                 |                 |            |                |                               |                | 1          |                 |                                   |            |                 |                  |                               |                 |                  |  |
| 2_052_05_S3_C3                                          |                            |                              |                                      |                                 |                 |                                |                 |                                 |                 |                                |                 |                   |                 |                 |                 |            |                |                               |                | 1          |                 |                                   |            |                 |                  |                               |                 |                  |  |
| 2_052_05_S4_C1                                          | 3                          |                              |                                      | 3                               | y               |                                | 3               | y                               |                 |                                |                 | 3                 | y               |                 |                 | 3          | y              |                               |                | 1          |                 |                                   |            |                 |                  |                               |                 |                  |  |
| 2_052_05_S4_C2                                          |                            |                              |                                      |                                 |                 |                                |                 |                                 |                 |                                |                 |                   |                 |                 |                 |            |                |                               |                | 2          | 2               |                                   | 3          | y               | y                |                               |                 |                  |  |
| 2_052_05_S4_C3                                          |                            |                              |                                      |                                 |                 |                                |                 |                                 |                 |                                |                 |                   |                 |                 |                 |            |                |                               |                | 2          |                 |                                   |            |                 |                  |                               |                 |                  |  |
| 2_156_04_S1_C3                                          | 1                          |                              |                                      | 1                               | y               |                                | 1               | y                               |                 |                                |                 | 1                 | y               |                 |                 | 1          | y              |                               |                | 1          | 1               |                                   | 1          | y               | y                |                               |                 |                  |  |
| 2_156_04_S3_C1                                          |                            |                              |                                      |                                 |                 |                                |                 |                                 |                 |                                |                 |                   |                 |                 |                 |            |                |                               |                | 2          |                 |                                   |            |                 |                  |                               |                 |                  |  |
| 2_156_04_S3_C2                                          | 3                          |                              |                                      | 2                               | n               |                                | 3               | y                               |                 | 6                              | n               | 3                 | y               |                 | 7               | y          |                |                               | 1              | 2          |                 | 2                                 | n          | n               |                  | 6                             | n               | n                |  |
| 2_156_04_S3_C3                                          |                            | 7                            | 0                                    |                                 |                 | 2                              | n               |                                 |                 |                                |                 |                   |                 |                 |                 |            |                |                               | 2              |            |                 |                                   |            |                 |                  |                               |                 |                  |  |
| 2_156_04_S4_C1                                          |                            |                              |                                      |                                 |                 |                                |                 |                                 |                 |                                |                 |                   |                 |                 |                 |            |                |                               |                | 1          |                 |                                   |            |                 |                  |                               |                 |                  |  |
| 2_156_04_S4_C2                                          | 3                          |                              |                                      | 2                               | n               |                                | 2               | n                               |                 |                                |                 | 3                 | y               |                 |                 | 3          | n              |                               |                | 1          | 1               |                                   | 3          | n               | y                |                               |                 |                  |  |
| 2_156_04_S4_C3                                          |                            |                              |                                      |                                 |                 |                                |                 |                                 |                 |                                |                 |                   |                 |                 |                 |            |                |                               |                | 1          |                 |                                   |            |                 |                  |                               |                 |                  |  |
| 2_177_06_S1_C1                                          | 1                          |                              |                                      | 1                               | y               |                                | 1               | y                               |                 |                                |                 | 1                 | y               |                 |                 | 1          | y              |                               |                | 2          | 1               |                                   | 2          | n               | y                |                               |                 |                  |  |
| 2_177_06_S1_C2                                          |                            |                              |                                      |                                 |                 |                                |                 |                                 |                 |                                |                 |                   |                 |                 |                 |            |                |                               |                | 2          |                 |                                   |            |                 |                  |                               |                 |                  |  |
| 2_177_06_S1_C3                                          |                            |                              |                                      |                                 |                 |                                |                 |                                 |                 |                                |                 |                   |                 |                 |                 |            |                |                               |                | 2          |                 |                                   |            |                 |                  |                               |                 |                  |  |
| 2_177_06_S3_C1                                          | 2                          | 6                            | 0                                    | 2                               | y               | 3                              | n               | 2                               | y               | 6                              | y               | 2                 | y               | 6               | y               | 2          | y              | 5                             | n              | 2          | 1               | 2                                 | 2          | y               | y                | 7                             | n               | n                |  |
| 2_177_06_S3_C2                                          |                            |                              |                                      |                                 |                 |                                |                 |                                 |                 |                                |                 |                   |                 |                 |                 |            |                |                               |                | 2          |                 |                                   |            |                 |                  |                               |                 |                  |  |
| 2_177_06_S3_C3                                          |                            |                              |                                      |                                 |                 |                                |                 |                                 |                 |                                |                 |                   |                 |                 |                 |            |                |                               |                | 2          |                 |                                   |            |                 |                  |                               |                 |                  |  |
| 2_177_06_S4_C1                                          | 3                          |                              |                                      | 2                               | n               |                                | 3               | y                               |                 |                                |                 | 3                 | y               |                 |                 | 3          | y              |                               |                | 1          | 2               |                                   | 3          | y               | y                |                               |                 |                  |  |
| 2_177_06_S4_C2                                          |                            |                              |                                      |                                 |                 |                                |                 |                                 |                 |                                |                 |                   |                 |                 |                 |            |                |                               |                | 2          |                 |                                   |            |                 |                  |                               |                 |                  |  |
| 2_177_06_S4_C3                                          |                            |                              |                                      |                                 |                 |                                |                 |                                 |                 |                                |                 |                   |                 |                 |                 |            |                |                               |                | 2          |                 |                                   |            |                 |                  |                               |                 |                  |  |
| 2_210_07_S1_C2                                          | 1                          |                              |                                      | 1                               | y               |                                | 1               | y                               |                 |                                |                 | 1                 | y               |                 |                 | 2          | n              |                               |                | 1          | 1               |                                   | 1          | y               | n                |                               |                 |                  |  |
| 2_210_07_S1_C3                                          |                            |                              |                                      |                                 |                 |                                |                 |                                 |                 |                                |                 |                   |                 |                 |                 |            |                |                               |                | 2          |                 |                                   |            |                 |                  |                               |                 |                  |  |
| 2_210_07_S3_C1                                          | 3                          | 6                            | 0                                    | 2                               | n               | 2                              | n               | 3                               | y               | 6                              | y               | 3                 | y               | 6               | y               | 3          | y              | 6                             | y              | 2          | 2               | 2                                 | 3          | y               | y                | 5                             | n               | n                |  |
| 2_210_07_S3_C2                                          |                            |                              |                                      |                                 |                 |                                |                 |                                 |                 |                                |                 |                   |                 |                 |                 |            |                |                               |                | 2          |                 |                                   |            |                 |                  |                               |                 |                  |  |
| 2_210_07_S3_C3                                          |                            |                              |                                      |                                 |                 |                                |                 |                                 |                 |                                |                 |                   |                 |                 |                 |            |                |                               |                | 1          |                 |                                   |            |                 |                  |                               |                 |                  |  |
| 2_210_07_S4_C1                                          | 2                          |                              |                                      | 2                               | y               |                                | 2               | y                               |                 |                                |                 | 2                 | y               |                 |                 | 2          | y              |                               |                | 1          | 2               |                                   | 2          | y               | y                |                               |                 |                  |  |
| 2_210_07_S4_C2                                          |                            |                              |                                      |                                 |                 |                                |                 |                                 |                 |                                |                 |                   |                 |                 |                 |            |                |                               |                | 1          |                 |                                   |            |                 |                  |                               |                 |                  |  |
| 2_210_07_S4_C3                                          |                            |                              |                                      |                                 |                 |                                |                 |                                 |                 |                                |                 |                   |                 |                 |                 |            |                |                               |                | 1          |                 |                                   |            |                 |                  |                               |                 |                  |  |
| 2_222_05_S1_C1                                          | 1                          |                              |                                      | 1                               | y               |                                | 1               | y                               |                 |                                |                 | 1                 | y               |                 |                 | 1          | y              |                               |                | 2          | 1               |                                   | 1          | y               | y                |                               |                 |                  |  |
| 2_222_05_S1_C2                                          |                            |                              |                                      |                                 |                 |                                |                 |                                 |                 |                                |                 |                   |                 |                 |                 |            |                |                               |                | 2          |                 |                                   |            |                 |                  |                               |                 |                  |  |
| 2_222_05_S1_C3                                          |                            |                              |                                      |                                 |                 |                                |                 |                                 |                 |                                |                 |                   |                 |                 |                 |            |                |                               |                | 2          |                 |                                   |            |                 |                  |                               |                 |                  |  |
| 2_222_05_S3_C1                                          | 1                          | 4                            | 0                                    | 1                               | y               | 2                              | n               | 1                               | y               | 4                              | y               | 1                 | y               | 4               | y               | 1          | y              | 5                             | n              | 2          | 1               | 2                                 | 1          | y               | y                | 4                             | y               | n                |  |
| 2_222_05_S3_C2                                          |                            |                              |                                      |                                 |                 |                                |                 |                                 |                 |                                |                 |                   |                 |                 |                 |            |                |                               |                | 2          |                 |                                   |            |                 |                  |                               |                 |                  |  |
| 2_222_05_S3_C3                                          |                            |                              |                                      |                                 |                 |                                |                 |                                 |                 |                                |                 |                   |                 |                 |                 |            |                |                               |                | 2          |                 |                                   |            |                 |                  |                               |                 |                  |  |
| 2_222_05_S4_C1                                          | 2                          |                              |                                      | 1                               | n               |                                | 2               | y                               |                 |                                |                 | 2                 | y               |                 |                 | 3          | n              |                               |                | 1          | 2               |                                   | 2          | y               | n                |                               |                 |                  |  |
| 2_222_05_S4_C2                                          |                            |                              |                                      |                                 |                 |                                |                 |                                 |                 |                                |                 |                   |                 |                 |                 |            |                |                               |                | 2          |                 |                                   |            |                 |                  |                               |                 |                  |  |
| 2_222_05_S4_C3                                          |                            |                              |                                      |                                 |                 |                                |                 |                                 |                 |                                |                 |                   |                 |                 |                 |            |                |                               |                | 1          |                 |                                   |            |                 |                  |                               |                 |                  |  |
| 2_316_03_S1_C1                                          | 1                          |                              |                                      | 1                               | y               |                                | 1               | y                               |                 |                                |                 | 1                 | y               |                 |                 | 1          | y              |                               |                | 2          | 1               |                                   | 1          | y               | y                |                               |                 |                  |  |
| 2_316_03_S1_C2                                          |                            |                              |                                      |                                 |                 |                                |                 |                                 |                 |                                |                 |                   |                 |                 |                 |            |                |                               |                | 2          |                 |                                   |            |                 |                  |                               |                 |                  |  |
| 2_316_03_S3_C1                                          | 2                          | 6                            | 0                                    | 2                               | y               | 3                              | n               | 2                               | y               | 6                              | y               | 2                 | y               | 5               | n               | 3          | n              | 7                             | n              | 2          | 2               | 2                                 | 2          | y               | n                | 5                             | n               | n                |  |
| 2_316_03_S3_C2                                          |                            |                              |                                      |                                 |                 |                                |                 |                                 |                 |                                |                 |                   |                 |                 |                 |            |                |                               |                | 1          |                 |                                   |            |                 |                  |                               |                 |                  |  |
| 2_316_03_S3_C3                                          |                            |                              |                                      |                                 |                 |                                |                 |                                 |                 |                                |                 |                   |                 |                 |                 |            |                |                               |                | 1          |                 |                                   |            |                 |                  |                               |                 |                  |  |
| 2_316_03_S4_C1                                          | 3                          |                              |                                      | 2                               | n               |                                | 3               | y                               |                 |                                |                 | 3                 | y               |                 |                 | 3          | y              |                               |                | 2          | 1               |                                   | 3          | y               | y                |                               |                 |                  |  |
| 2_316_03_S4_C2                                          |                            |                              |                                      |                                 |                 |                                |                 |                                 |                 |                                |                 |                   |                 |                 |                 |            |                |                               |                | 1          |                 |                                   |            |                 |                  |                               |                 |                  |  |
| 2_316_03_S4_C3                                          |                            |                              |                                      |                                 |                 |                                |                 |                                 |                 |                                |                 |                   |                 |                 |                 |            |                |                               |                | 2          |                 |                                   |            |                 |                  |                               |                 |                  |  |
| 2_427_07_S1_C1                                          | 1                          |                              |                                      | 1                               | y               |                                | 1               | y                               |                 |                                |                 | 3                 | n               |                 |                 | 1          | y              |                               |                | 1          | 1               |                                   | 2          | n               | n                |                               |                 |                  |  |
| 2_427_07_S1_C2                                          |                            |                              |                                      |                                 |                 |                                |                 |                                 |                 |                                |                 |                   |                 |                 |                 |            |                |                               |                | 1          |                 |                                   |            |                 |                  |                               |                 |                  |  |
| 2_427_07_S1_C3                                          |                            |                              |                                      |                                 |                 |                                |                 |                                 |                 |                                |                 |                   |                 |                 |                 |            |                |                               |                | 1          |                 |                                   |            |                 |                  |                               |                 |                  |  |
| 2_427_07_S3_C1                                          | 1                          | 5                            | 0                                    | 1                               | y               | 3                              | n               | 1                               | y               | 5                              | n               | 1                 | y               | 7               | n               | 1          | y              | 4                             | v              | 1          | 1               | 2                                 | 1          | y               | y                | 6                             | n               | n                |  |



| Sample ID<br>(Subject ID_<br>Sample No._<br>Colony No.) | Phylogeny                  |                              |                                      | Phylogroup                      |                 | MLST                           |                 |                                 | Serotype        |                                |                 | Resistance        |                 |                 |                 |            |                | Virulence                     |                |            |                 |                                   |            |                 |                  |                               |                 |                  |   |
|---------------------------------------------------------|----------------------------|------------------------------|--------------------------------------|---------------------------------|-----------------|--------------------------------|-----------------|---------------------------------|-----------------|--------------------------------|-----------------|-------------------|-----------------|-----------------|-----------------|------------|----------------|-------------------------------|----------------|------------|-----------------|-----------------------------------|------------|-----------------|------------------|-------------------------------|-----------------|------------------|---|
|                                                         | No. clades w/in time point | No. clades across time point | No. clades shared across time points | No. phylogroups w/in time point | Like phylogeny? | No. phylogroups within subject | Like phylogeny? | No. phylogroups w/in time point | Like phylogeny? | No. phylogroups within subject | Like phylogeny? | No. per timepoint | Like phylogeny? | No. per subject | Like phylogeny? | No. clades | Like phylogeny | No. clades across time points | Like phylogeny | Superclade | No. superclades | No. superclades across time point | No. clades | Like phylogeny? | Like resistance? | No. clades across time points | Like phylogeny? | Like resistance? |   |
| 3_373_03_S3_C2                                          | 2                          | 4                            | 0                                    | 1                               | n               | 1                              | n               | 2                               | y               | 3                              | n               | 2                 | y               | 4               | y               | 2          | y              | 4                             | y              | 2          | 2               | 2                                 | 2          | 2               | y                | y                             | 3               | n                | n |
| 3_373_03_S3_C3                                          |                            |                              |                                      |                                 |                 |                                |                 |                                 |                 |                                |                 |                   |                 |                 |                 |            |                |                               |                | 2          |                 |                                   |            |                 |                  |                               |                 |                  |   |
| 3_373_03_S4_C1                                          |                            |                              |                                      |                                 |                 |                                |                 |                                 |                 |                                |                 |                   |                 |                 |                 |            |                |                               |                | 2          |                 |                                   |            |                 |                  |                               |                 |                  |   |
| 3_373_03_S4_C2                                          | 1                          |                              |                                      | 1                               | y               |                                |                 | 1                               | y               |                                |                 | 1                 | y               |                 |                 | 1          | y              |                               |                | 2          | 1               |                                   | 1          | y               | y                |                               |                 |                  |   |
| 3_373_03_S4_C3                                          |                            |                              |                                      |                                 |                 |                                |                 |                                 |                 |                                |                 |                   |                 |                 |                 |            |                |                               |                | 2          |                 |                                   |            |                 |                  |                               |                 |                  |   |
| 3_475_03_S1_C1                                          | 2                          |                              |                                      | 2                               | y               |                                |                 | 2                               | y               |                                |                 | 2                 | y               |                 |                 | 2          | y              |                               |                | 1          | 2               |                                   | 2          | y               | y                |                               |                 |                  |   |
| 3_475_03_S1_C2                                          |                            |                              |                                      |                                 |                 |                                |                 |                                 |                 |                                |                 |                   |                 |                 |                 |            |                |                               |                | 2          |                 |                                   |            |                 |                  |                               |                 |                  |   |
| 3_475_03_S3_C1                                          | 2                          | 6                            | 0                                    | 1                               | n               | 2                              | n               | 2                               | y               | 6                              | y               | 2                 | y               | 6               | y               | 2          | y              | 5                             | n              | 2          | 2               | 2                                 | 2          | y               | y                | 6                             | y               | n                |   |
| 3_475_03_S3_C2                                          |                            |                              |                                      |                                 |                 |                                |                 |                                 |                 |                                |                 |                   |                 |                 |                 |            |                |                               |                | 1          |                 |                                   |            |                 |                  |                               |                 |                  |   |
| 3_475_03_S4_C1                                          | 2                          |                              |                                      | 1                               | n               |                                |                 | 2                               | y               |                                |                 | 2                 | y               |                 |                 | 2          | y              |                               |                | 1          | 2               |                                   | 2          | y               | y                |                               |                 |                  |   |
| 3_475_03_S4_C2                                          |                            |                              |                                      |                                 |                 |                                |                 |                                 |                 |                                |                 |                   |                 |                 |                 |            |                |                               |                | 2          |                 |                                   |            |                 |                  |                               |                 |                  |   |
| 4_203_08_S1_C1                                          | 1                          |                              |                                      | 1                               | y               |                                |                 | 1                               | y               |                                |                 | 1                 | y               |                 |                 | 2          | n              |                               |                | 2          | 1               |                                   | 1          | y               | n                |                               |                 |                  |   |
| 4_203_08_S1_C2                                          |                            |                              |                                      |                                 |                 |                                |                 |                                 |                 |                                |                 |                   |                 |                 |                 |            |                |                               |                | 2          |                 |                                   |            |                 |                  |                               |                 |                  |   |
| 4_203_08_S1_C3                                          |                            |                              |                                      |                                 |                 |                                |                 |                                 |                 |                                |                 |                   |                 |                 |                 |            |                |                               |                | 2          |                 |                                   |            |                 |                  |                               |                 |                  |   |
| 4_203_08_S3_C1                                          | 2                          | 3                            | 1                                    | 1                               | n               | 1                              | n               | 1                               | n               | 2                              | n               | 2                 | y               | 3               | y               | 2          | y              | 5                             | n              | 1          | 1               | 2                                 | 2          | y               | y                | 3                             | n               | n                |   |
| 4_203_08_S3_C2                                          |                            |                              |                                      |                                 |                 |                                |                 |                                 |                 |                                |                 |                   |                 |                 |                 |            |                |                               |                | 1          |                 |                                   |            |                 |                  |                               |                 |                  |   |
| 4_203_08_S3_C3                                          |                            |                              |                                      |                                 |                 |                                |                 |                                 |                 |                                |                 |                   |                 |                 |                 |            |                |                               |                | 1          |                 |                                   |            |                 |                  |                               |                 |                  |   |
| 4_203_08_S4_C2                                          | 1                          |                              |                                      | 1                               | y               |                                |                 | 1                               | y               |                                |                 | 1                 | y               |                 |                 | 2          | n              |                               |                | 1          | 2               |                                   | 1          | y               | n                |                               |                 |                  |   |
| 4_203_08_S4_C3                                          |                            |                              |                                      |                                 |                 |                                |                 |                                 |                 |                                |                 |                   |                 |                 |                 |            |                |                               |                | 2          |                 |                                   |            |                 |                  |                               |                 |                  |   |
| 5_172_05_S1_C3                                          | 1                          |                              |                                      | 1                               | y               |                                |                 | 1                               | y               |                                |                 | 1                 | y               |                 |                 | 1          | y              |                               |                | 2          | 1               |                                   | 1          | y               | y                |                               |                 |                  |   |
| 5_172_05_S3_C1                                          | 2                          |                              |                                      | 1                               | n               |                                |                 | 2                               | y               |                                |                 | 2                 | y               |                 |                 | 2          | n              |                               |                | 1          | 2               |                                   | 2          | y               | y                |                               |                 |                  |   |
| 5_172_05_S3_C3                                          |                            | 4                            | 0                                    |                                 |                 | 1                              | n               |                                 |                 | 4                              | y               |                   |                 | 4               | y               |            |                | 3                             | n              | 2          | 2               | 2                                 |            |                 |                  | 4                             | y               | n                |   |
| 5_172_05_S4_C1                                          | 1                          |                              |                                      | 1                               | y               |                                |                 | 1                               | y               |                                |                 | 1                 | y               |                 |                 | 1          | y              |                               |                | 1          | 1               |                                   | 1          | y               | y                |                               |                 |                  |   |
| 5_172_05_S4_C2                                          |                            |                              |                                      |                                 |                 |                                |                 |                                 |                 |                                |                 |                   |                 |                 |                 |            |                |                               |                | 1          |                 |                                   |            |                 |                  |                               |                 |                  |   |
| 5_172_05_S4_C3                                          |                            |                              |                                      |                                 |                 |                                |                 |                                 |                 |                                |                 |                   |                 |                 |                 |            |                |                               |                | 1          |                 |                                   |            |                 |                  |                               |                 |                  |   |
| 5_366_08_S1_C1                                          | 1                          |                              |                                      | 1                               | y               |                                |                 | 1                               | y               |                                |                 | 1                 | y               |                 |                 | 1          | y              |                               |                | 2          | 1               |                                   | 1          | y               | y                |                               |                 |                  |   |
| 5_366_08_S1_C3                                          |                            |                              |                                      |                                 |                 |                                |                 |                                 |                 |                                |                 |                   |                 |                 |                 |            |                |                               |                | 2          |                 |                                   |            |                 |                  |                               |                 |                  |   |
| 5_366_08_S3_C1                                          | 2                          | 5                            | 0                                    | 2                               | y               | 3                              | n               | 2                               | y               | 6                              | n               | 2                 | y               | 5               | y               | 2          | y              | 5                             | y              | 2          | 1               | 2                                 | 2          | y               | y                | 4                             | n               | n                |   |
| 5_366_08_S3_C2                                          |                            |                              |                                      |                                 |                 |                                |                 |                                 |                 |                                |                 |                   |                 |                 |                 |            |                |                               |                | 2          |                 |                                   |            |                 |                  |                               |                 |                  |   |
| 5_366_08_S3_C3                                          |                            |                              |                                      |                                 |                 |                                |                 |                                 |                 |                                |                 |                   |                 |                 |                 |            |                |                               |                | 2          |                 |                                   |            |                 |                  |                               |                 |                  |   |
| 5_366_08_S4_C1                                          | 2                          |                              |                                      | 1                               | n               |                                |                 | 2                               | y               |                                |                 | 2                 | y               |                 |                 | 2          | y              |                               |                | 2          | 2               |                                   | 2          | y               | y                |                               |                 |                  |   |
| 5_366_08_S4_C2                                          |                            |                              |                                      |                                 |                 |                                |                 |                                 |                 |                                |                 |                   |                 |                 |                 |            |                |                               |                | 1          |                 |                                   |            |                 |                  |                               |                 |                  |   |
| 6_175_07_S1_C1                                          | 2                          |                              |                                      | 2                               | y               |                                |                 | 2                               | y               |                                |                 | 2                 | y               |                 |                 | 2          | y              |                               |                | 2          | 2               |                                   | 2          | y               | y                |                               |                 |                  |   |
| 6_175_07_S1_C2                                          |                            |                              |                                      |                                 |                 |                                |                 |                                 |                 |                                |                 |                   |                 |                 |                 |            |                |                               |                | 2          |                 |                                   |            |                 |                  |                               |                 |                  |   |
| 6_175_07_S1_C3                                          |                            |                              |                                      |                                 |                 |                                |                 |                                 |                 |                                |                 |                   |                 |                 |                 |            |                |                               |                | 2          |                 |                                   |            |                 |                  |                               |                 |                  |   |
| 6_175_07_S3_C1                                          | 1                          | 4                            | 0                                    | 1                               | n               | 3                              | n               | 1                               | y               | 4                              | y               | 1                 | y               | 4               | y               | 2          | n              | 5                             | y              | 1          | 2               | 2                                 | 2          | n               | y                | 5                             | y               | y                |   |
| 6_175_07_S3_C2                                          |                            |                              |                                      |                                 |                 |                                |                 |                                 |                 |                                |                 |                   |                 |                 |                 |            |                |                               |                | 2          |                 |                                   |            |                 |                  |                               |                 |                  |   |
| 6_175_07_S3_C3                                          |                            |                              |                                      |                                 |                 |                                |                 |                                 |                 |                                |                 |                   |                 |                 |                 |            |                |                               |                | 2          |                 |                                   |            |                 |                  |                               |                 |                  |   |
| 6_175_07_S4_C1                                          | 1                          |                              |                                      | 1                               | n               |                                |                 | 1                               | y               |                                |                 | 1                 | y               |                 |                 | 2          | n              |                               |                | 1          | 1               |                                   | 1          | y               | n                |                               |                 |                  |   |
| 6_175_07_S4_C2                                          |                            |                              |                                      |                                 |                 |                                |                 |                                 |                 |                                |                 |                   |                 |                 |                 |            |                |                               |                | 1          |                 |                                   |            |                 |                  |                               |                 |                  |   |
| 6_175_07_S4_C3                                          |                            |                              |                                      |                                 |                 |                                |                 |                                 |                 |                                |                 |                   |                 |                 |                 |            |                |                               |                | 1          |                 |                                   |            |                 |                  |                               |                 |                  |   |
| 6_319_05_S1_C1                                          | 1                          |                              |                                      | 1                               | y               |                                |                 | 2                               | n               |                                |                 | 1                 | y               |                 |                 | 1          | y              |                               |                | 2          | 1               |                                   | 1          | y               | y                |                               |                 |                  |   |
| 6_319_05_S1_C2                                          |                            |                              |                                      |                                 |                 |                                |                 |                                 |                 |                                |                 |                   |                 |                 |                 |            |                |                               |                | 2          |                 |                                   |            |                 |                  |                               |                 |                  |   |
| 6_319_05_S1_C3                                          |                            |                              |                                      |                                 |                 |                                |                 |                                 |                 |                                |                 |                   |                 |                 |                 |            |                |                               |                | 2          |                 |                                   |            |                 |                  |                               |                 |                  |   |
| 6_319_05_S3_C1                                          | 1                          | 3                            | 0                                    | 1                               | y               | 3                              | y               | 1                               | y               | 4                              | n               | 1                 | y               | 3               | y               | 2          | n              | 5                             | n              | 1          | 2               | 2                                 | 1          | y               | n                | 3                             | y               | n                |   |
| 6_319_05_S3_C2                                          |                            |                              |                                      |                                 |                 |                                |                 |                                 |                 |                                |                 |                   |                 |                 |                 |            |                |                               |                | 2          |                 |                                   |            |                 |                  |                               |                 |                  |   |
| 6_319_05_S3_C3                                          |                            |                              |                                      |                                 |                 |                                |                 |                                 |                 |                                |                 |                   |                 |                 |                 |            |                |                               |                | 2          |                 |                                   |            |                 |                  |                               |                 |                  |   |
| 6_319_05_S4_C2                                          | 1                          |                              |                                      | 1                               | y               |                                |                 | 1                               | y               |                                |                 | 1                 | y               |                 |                 | 2          | n              |                               |                | 1          | 2               |                                   | 1          | y               | n                |                               |                 |                  |   |
| 6_319_05_S4_C3                                          |                            |                              |                                      |                                 |                 |                                |                 |                                 |                 |                                |                 |                   |                 |                 |                 |            |                |                               |                | 2          |                 |                                   |            |                 |                  |                               |                 |                  |   |
| 6_537_08_S1_C1                                          | 1                          |                              |                                      | 1                               | y               |                                |                 | 1                               | y               |                                |                 | 1                 | y               |                 |                 | 2          | n              |                               |                | 2          | 1               |                                   | 1          | y               | n                |                               |                 |                  |   |
| 6_537_08_S1_C2                                          |                            |                              |                                      |                                 |                 |                                |                 |                                 |                 |                                |                 |                   |                 |                 |                 |            |                |                               |                | 2          |                 |                                   |            |                 |                  |                               |                 |                  |   |
| 6_537_08_S1_C3                                          |                            |                              |                                      |                                 |                 |                                |                 |                                 |                 |                                |                 |                   |                 |                 |                 |            |                |                               |                | 2          |                 |                                   |            |                 |                  |                               |                 |                  |   |
| 6_537_08_S3_C1                                          | 1                          | 3                            | 0                                    | 1                               | y               | 2                              | n               | 1                               | y               | 3                              | y               | 1                 | y               | 3               | y               | 2          | n              | 5                             | n              | 1          | 1               | 2                                 | 1          | y               | n                | 3                             | y               | n                |   |
| 6_537_08_S3_C2                                          |                            |                              |                                      |                                 |                 |                                |                 |                                 |                 |                                |                 |                   |                 |                 |                 |            |                |                               |                | 1          |                 |                                   |            |                 |                  |                               |                 |                  |   |
| 6_537_08_S3_C3                                          |                            |                              |                                      |                                 |                 |                                |                 |                                 |                 |                                |                 |                   |                 |                 |                 |            |                |                               |                | 1          |                 |                                   |            |                 |                  |                               |                 |                  |   |
| 6_537_08_S4_C1                                          | 1                          |                              |                                      | 1                               | y               |                                |                 | 1                               | y               |                                |                 | 1                 | y               |                 |                 | 1          | y              |                               |                | 1          | 1               |                                   | 1          | y               | n                |                               |                 |                  |   |

| Sample ID<br>(Subject ID_<br>Sample No.,<br>Colony No.) | Phylogeny                  |                              |                                      | Phylogroup                      |                 |                                | MLST            |                                 |                 | Serotype                       |                 |                   | Resistance      |                 |                 |            |                | Virulence                     |                |            |                 |                                   |            |                 |                  |                               |                 |                  |
|---------------------------------------------------------|----------------------------|------------------------------|--------------------------------------|---------------------------------|-----------------|--------------------------------|-----------------|---------------------------------|-----------------|--------------------------------|-----------------|-------------------|-----------------|-----------------|-----------------|------------|----------------|-------------------------------|----------------|------------|-----------------|-----------------------------------|------------|-----------------|------------------|-------------------------------|-----------------|------------------|
|                                                         | No. clades w/in time point | No. clades across time point | No. clades shared across time points | No. phylogroups w/in time point | Like phylogeny? | No. phylogroups within subject | Like phylogeny? | No. phylogroups w/in time point | Like phylogeny? | No. phylogroups within subject | Like phylogeny? | No. per timepoint | Like phylogeny? | No. per subject | Like phylogeny? | No. clades | Like phylogeny | No. clades across time points | Like phylogeny | Superclade | No. superclades | No. superclades across time point | No. clades | Like phylogeny? | Like resistance? | No. clades across time points | Like phylogeny? | Like resistance? |
| 6_537_08_S4_C2                                          | -                          | -                            | -                                    | -                               | y               | -                              | -               | y                               | -               | -                              | y               | -                 | -               | -               | -               | y          | -              | -                             | 1              | -          | -               | -                                 | -          | y               | y                | -                             | -               | -                |
| 7_233_03_S1_C2                                          | 1                          | -                            | -                                    | 1                               | y               | -                              | 1               | y                               | -               | -                              | 1               | y                 | -               | -               | -               | 1          | y              | -                             | 1              | 1          | -               | -                                 | 1          | y               | y                | -                             | -               | -                |
| 7_233_03_S1_C3                                          | -                          | -                            | -                                    | -                               | -               | -                              | -               | -                               | -               | -                              | -               | -                 | -               | -               | -               | -          | -              | -                             | 1              | -          | -               | -                                 | -          | -               | -                | -                             | -               | -                |
| 7_233_03_S3_C1                                          | -                          | -                            | -                                    | -                               | -               | -                              | -               | -                               | -               | -                              | -               | -                 | -               | -               | -               | -          | -              | -                             | 1              | -          | -               | -                                 | -          | -               | -                | -                             | -               | -                |
| 7_233_03_S3_C2                                          | 2                          | 5                            | 0                                    | 1                               | n               | 1                              | n               | 2                               | y               | 4                              | n               | 3                 | n               | 6               | n               | 2          | y              | 5                             | y              | 1          | 1               | 1                                 | 2          | y               | y                | 5                             | y               | y                |
| 7_233_03_S3_C3                                          | -                          | -                            | -                                    | -                               | -               | -                              | -               | -                               | -               | -                              | -               | -                 | -               | -               | -               | -          | -              | -                             | 1              | -          | -               | -                                 | -          | -               | -                | -                             | -               | -                |
| 7_233_03_S4_C1                                          | -                          | -                            | -                                    | -                               | -               | -                              | -               | -                               | -               | -                              | -               | -                 | -               | -               | -               | -          | -              | -                             | 1              | 1          | 1               | -                                 | 2          | y               | y                | -                             | -               | -                |
| 7_233_03_S4_C2                                          | 2                          | -                            | -                                    | 1                               | n               | -                              | -               | 2                               | y               | -                              | -               | 2                 | y               | -               | -               | 2          | y              | -                             | 1              | 1          | -               | -                                 | 2          | y               | y                | -                             | -               | -                |
| 7_233_03_S4_C3                                          | -                          | -                            | -                                    | -                               | -               | -                              | -               | -                               | -               | -                              | -               | -                 | -               | -               | -               | -          | -              | -                             | 1              | -          | -               | -                                 | -          | -               | -                | -                             | -               | -                |
| 8_415_05_S1_C1                                          | 1                          | -                            | -                                    | 1                               | y               | -                              | -               | 1                               | y               | -                              | -               | 1                 | y               | -               | -               | 2          | n              | -                             | 2              | 2          | -               | -                                 | 1          | y               | n                | -                             | -               | -                |
| 8_415_05_S1_C2                                          | -                          | -                            | -                                    | -                               | -               | -                              | -               | -                               | -               | -                              | -               | -                 | -               | -               | -               | -          | -              | -                             | 1              | -          | -               | -                                 | -          | -               | -                | -                             | -               | -                |
| 8_415_05_S3_C1                                          | -                          | -                            | -                                    | -                               | -               | -                              | -               | -                               | -               | -                              | -               | -                 | -               | -               | -               | -          | -              | -                             | 2              | -          | -               | -                                 | -          | -               | -                | -                             | -               | -                |
| 8_415_05_S3_C2                                          | 1                          | 2                            | 1                                    | 1                               | y               | 2                              | y               | 1                               | y               | 3                              | n               | 1                 | y               | 2               | y               | 1          | y              | 3                             | n              | 2          | 1               | 2                                 | 1          | y               | y                | 2                             | y               | n                |
| 8_415_05_S3_C3                                          | -                          | -                            | -                                    | -                               | -               | -                              | -               | -                               | -               | -                              | -               | -                 | -               | -               | -               | -          | -              | -                             | 2              | -          | -               | -                                 | -          | -               | -                | -                             | -               | -                |
| 8_415_05_S4_C1                                          | -                          | -                            | -                                    | -                               | -               | -                              | -               | -                               | -               | -                              | -               | -                 | -               | -               | -               | -          | -              | -                             | 2              | -          | -               | -                                 | -          | -               | -                | -                             | -               | -                |
| 8_415_05_S4_C2                                          | 1                          | -                            | -                                    | 1                               | y               | -                              | -               | 2                               | n               | -                              | -               | 1                 | y               | -               | -               | 1          | y              | -                             | 2              | 1          | -               | -                                 | 1          | y               | n                | -                             | -               | -                |
| 8_415_05_S4_C3                                          | -                          | -                            | -                                    | -                               | -               | -                              | -               | -                               | -               | -                              | -               | -                 | -               | -               | -               | -          | -              | -                             | 2              | -          | -               | -                                 | -          | -               | -                | -                             | -               | -                |
| Total in common with phylogeny                          |                            |                              |                                      | 65                              | 4               | 85                             | 18              | 84                              | 23              |                                |                 |                   |                 |                 |                 |            |                |                               |                |            |                 |                                   |            |                 |                  |                               |                 |                  |
