# Supplementary material for: Temporal Variability of Escherichia coli Diversity in the Gastrointestinal Tracts of Tanzanian Children with and without Exposure to Antibiotics
Source: PubMed Central journal article supplement (PMC6222053; doi:10.1128/msphere.00558-18), 2018-11-07
Supplement: sph006182690st5.pdf [file sph006182690st5.pdf]

**Table S5. Examples of isolates with identical serotypes, but differing sequence type and/or phylotype**

|                                                      | Isolate        | MLST | Phylotype | Serotype    |
|------------------------------------------------------|----------------|------|-----------|-------------|
| <i>Shared serotype, different MLST and phylotype</i> | 6_175_07_S1_C2 | 38   | D         | O153var1:H2 |
|                                                      | 6_175_07_S1_C3 | 38   | D         | O153var1:H2 |
|                                                      | 3_267_03_S3_C2 | 101  | B1        | O153var1:H2 |
|                                                      | 2_005_03_S4_C2 | 452  | B2        | O81:H27     |
|                                                      | 2_005_03_S4_C3 | 452  | B2        | O81:H27     |
|                                                      | 2_005_03_S3_C1 | 2178 | B1        | O81:H27     |
|                                                      | 2_005_03_S3_C3 | 2178 | B1        | O81:H27     |
| <i>Shared serotype and phylotype, different MLST</i> | 1_110_08_S3_C1 | 10   | A         | O176:H33    |
|                                                      | 1_110_08_S3_C2 | 10   | A         | O176:H33    |
|                                                      | 1_110_08_S3_C3 | 10   | A         | O176:H33    |
|                                                      | 5_366_08_S4_C1 | 5793 | A         | O176:H33    |
|                                                      | 3_105_05_S1_C2 | 206  | A         | O60:H5      |
|                                                      | 5_172_05_S3_C3 | 206  | A         | O60:H5      |
|                                                      | 3_373_03_S1_C1 | 5293 | A         | O60:H5      |
|                                                      | 3_373_03_S1_C2 | 5293 | A         | O60:H5      |
|                                                      | 3_373_03_S1_C3 | 5293 | A         | O60:H5      |
| <i>Shared serotype and MLST, different phylotype</i> | 2_005_03_S1_C1 | 5257 | B1        | O8:H12      |
|                                                      | 2_005_03_S1_C2 | 5257 | B1        | O8:H12      |
|                                                      | 2_005_03_S1_C3 | 5257 | E         | O8:H12      |
|                                                      | 2_052_05_S1_C1 | 5257 | B1        | O8:H12      |
|                                                      | 2_177_06_S1_C1 | 5257 | B1        | O8:H12      |
|                                                      | 2_177_06_S1_C2 | 5257 | B1        | O8:H12      |
|                                                      | 2_177_06_S1_C3 | 5257 | B1        | O8:H12      |
