# Supplementary material for: Temporal Variability of Escherichia coli Diversity in the Gastrointestinal Tracts of Tanzanian Children with and without Exposure to Antibiotics
Source: PubMed Central journal article supplement (PMC6222053; doi:10.1128/msphere.00558-18), 2018-11-07
Supplement: sph006182690st7.pdf [file sph006182690st7.pdf]

**Table S7: Presence of Macrolide Resistance Genes**

|                | <i>mphB</i> | <i>mphA</i> | <i>mphC</i> | <i>ermG</i> | total in<br>timepoint<br>with<br>resistance<br>genes | %   | pre vs<br>post | %   |
|----------------|-------------|-------------|-------------|-------------|------------------------------------------------------|-----|----------------|-----|
| 1_110_08_S1_C1 | 0           | 0           | 0           | 0.13        |                                                      |     |                |     |
| 1_110_08_S1_C2 | 0           | 0           | 0           | 0.13        | 0                                                    | 0   | 0              | 0   |
| 1_110_08_S1_C3 | 0           | 0           | 0           | 0.13        |                                                      |     |                |     |
| 1_110_08_S3_C1 | 0           | 0           | 0           | 0.13        |                                                      |     |                |     |
| 1_110_08_S3_C2 | 0           | 0           | 0           | 0.13        | 0                                                    | 0   |                |     |
| 1_110_08_S3_C3 | 0           | 0           | 0           | 0.13        |                                                      |     | 3              | 50  |
| 1_110_08_S4_C1 | 0.33        | 1           | 0.31        | 0.13        |                                                      |     |                |     |
| 1_110_08_S4_C2 | 0.33        | 1           | 0.31        | 0.13        | 3                                                    | 100 |                |     |
| 1_110_08_S4_C3 | 0.33        | 1           | 0.31        | 0.13        |                                                      |     |                |     |
| 1_176_05_S1_C1 | 0           | 0           | 0           | 0.13        | 0                                                    | 0   | 0              | 0   |
| 1_176_05_S1_C2 | 0           | 0           | 0           | 0.13        |                                                      |     |                |     |
| 1_176_05_S1_C3 | 0           | 0           | 0           | 0.13        |                                                      |     |                |     |
| 1_176_05_S3_C1 | 0.33        | 1           | 0.31        | 0.13        | 1                                                    | 50  |                |     |
| 1_176_05_S3_C2 | 0           | 0           | 0           | 0.13        |                                                      |     | 4              | 80  |
| 1_176_05_S4_C1 | 0.33        | 1           | 0.31        | 0.13        |                                                      |     |                |     |
| 1_176_05_S4_C2 | 0.33        | 1           | 0.31        | 0.13        | 3                                                    | 100 |                |     |
| 1_176_05_S4_C3 | 0.33        | 1           | 0.31        | 0.13        |                                                      |     |                |     |
| 1_182_04_S1_C1 | 0           | 0           | 0           | 0.13        | 0                                                    | 0   | 0              | 0   |
| 1_182_04_S1_C2 | 0           | 0           | 0           | 0.13        |                                                      |     |                |     |
| 1_182_04_S1_C3 | 0           | 0.06        | 0           | 0.13        |                                                      |     |                |     |
| 1_182_04_S3_C1 | 0.33        | 1           | 0.31        | 0.13        |                                                      |     |                |     |
| 1_182_04_S3_C2 | 0           | 0           | 0           | 0.07        | 2                                                    | 66  |                |     |
| 1_182_04_S3_C3 | 0.33        | 1           | 0.31        | 0.13        |                                                      |     | 2              | 33  |
| 1_182_04_S4_C1 | 0           | 0           | 0           | 0.13        |                                                      |     |                |     |
| 1_182_04_S4_C2 | 0           | 0           | 0           | 0.13        | 0                                                    | 0   |                |     |
| 1_182_04_S4_C3 | 0           | 0           | 0           | 0.13        |                                                      |     |                |     |
| 1_250_04_S1_C1 | 0.33        | 1           | 0.31        | 0.13        |                                                      |     |                |     |
| 1_250_04_S1_C2 | 0.33        | 0.98        | 0.31        | 0.13        | 3                                                    | 100 | 3              | 100 |
| 1_250_04_S1_C3 | 0.33        | 1           | 0.31        | 0.13        |                                                      |     |                |     |
| 1_250_04_S3_C1 | 0.33        | 1           | 0.31        | 0.13        |                                                      |     |                |     |
| 1_250_04_S3_C2 | 0.33        | 1           | 0.31        | 0.12        | 2                                                    | 100 | 4              | 100 |
| 1_250_04_S4_C1 | 0.33        | 1           | 0.31        | 0.13        |                                                      |     |                |     |
| 1_250_04_S4_C2 | 0.33        | 1           | 0.31        | 0.13        | 2                                                    | 100 |                |     |
| 1_392_07_S1_C1 | 0           | 0           | 0           | 0.13        | 0                                                    | 0   | 0              | 0   |
| 1_392_07_S1_C2 | 0           | 0           | 0           | 0.13        |                                                      |     |                |     |
| 1_392_07_S3_C1 | 0           | 0           | 0           | 0.13        |                                                      |     |                |     |
| 1_392_07_S3_C2 | 0           | 0           | 0           | 0.13        | 0                                                    | 0   |                |     |
| 1_392_07_S3_C3 | 0           | 0           | 0           | 0.13        |                                                      |     | 2              | 33  |
| 1_392_07_S4_C1 | 0.33        | 1           | 0.31        | 0.13        |                                                      |     |                |     |
| 1_392_07_S4_C2 | 0           | 0           | 0           | 0.13        | 2                                                    | 66  |                |     |
| 1_392_07_S4_C3 | 0.33        | 1           | 0.31        | 0.13        |                                                      |     |                |     |
| 2_005_03_S1_C1 | 0           | 0.06        | 0           | 0.13        | 0                                                    | 0   | 0              | 0   |
| 2_005_03_S1_C2 | 0           | 0.06        | 0           | 0.13        |                                                      |     |                |     |
| 2_005_03_S1_C3 | 0           | 0.06        | 0           | 0.13        |                                                      |     |                |     |
| 2_005_03_S3_C1 | 0.33        | 1           | 0.31        | 0.13        |                                                      |     |                |     |
| 2_005_03_S3_C2 | 0           | 0           | 0           | 0.13        | 2                                                    | 66  |                |     |
| 2_005_03_S3_C3 | 0.33        | 1           | 0.31        | 0.13        |                                                      |     | 2              | 33  |
| 2_005_03_S4_C1 | 0           | 0           | 0           | 0.13        |                                                      |     |                |     |
| 2_005_03_S4_C2 | 0           | 0           | 0           | 0.13        | 0                                                    | 0   |                |     |
| 2_005_03_S4_C3 | 0           | 0           | 0           | 0.13        |                                                      |     |                |     |
| 2_011_08_S1_C1 | 0           | 0           | 0           | 0.13        |                                                      |     |                |     |

|                | <i>mphB</i> | <i>mphA</i> | <i>mphC</i> | <i>ermG</i> | total in<br>timepoint<br>with<br>resistance<br>genes | %  | pre vs<br>post | %    |
|----------------|-------------|-------------|-------------|-------------|------------------------------------------------------|----|----------------|------|
| 2_011_08_S1_C2 | 0           | 0           | 0           | 0.13        | 0                                                    | 0  | 0              | 0    |
| 2_011_08_S1_C3 | 0           | 0           | 0           | 0.13        |                                                      |    |                |      |
| 2_011_08_S3_C1 | 0.33        | 1           | 0.31        | 0.13        | 2                                                    | 66 | 2              | 40   |
| 2_011_08_S3_C2 | 0           | 0           | 0           | 0.13        |                                                      |    |                |      |
| 2_011_08_S3_C3 | 0.33        | 1           | 0.31        | 0.13        |                                                      |    |                |      |
| 2_011_08_S4_C1 | 0           | 0           | 0           | 0.13        | 0                                                    | 0  |                |      |
| 2_011_08_S4_C3 | 0           | 0           | 0           | 0.13        |                                                      |    |                |      |
| 2_052_05_S1_C1 | 0           | 0.06        | 0           | 0.13        | 0                                                    | 0  | 0              | 0    |
| 2_052_05_S1_C3 | 0           | 0.06        | 0           | 0.13        |                                                      |    |                |      |
| 2_052_05_S3_C1 | 0           | 0           | 0           | 0.13        | 0                                                    | 0  | 0              | 0    |
| 2_052_05_S3_C2 | 0           | 0           | 0           | 0.13        |                                                      |    |                |      |
| 2_052_05_S3_C3 | 0           | 0           | 0           | 0.13        |                                                      |    |                |      |
| 2_052_05_S4_C1 | 0           | 0           | 0           | 0.13        | 0                                                    | 0  |                |      |
| 2_052_05_S4_C2 | 0           | 0           | 0           | 0.13        |                                                      |    |                |      |
| 2_052_05_S4_C3 | 0           | 0           | 0           | 0.13        |                                                      |    |                |      |
| 2_156_04_S1_C3 | 0           | 0           | 0           | 0.13        | 0                                                    | 0  | 0              | 0    |
| 2_156_04_S3_C1 | 0           | 0           | 0           | 0.13        | 0                                                    | 0  | 0              | 0    |
| 2_156_04_S3_C2 | 0           | 0           | 0           | 0.13        |                                                      |    |                |      |
| 2_156_04_S3_C3 | 0           | 0           | 0           | 0.13        |                                                      |    |                |      |
| 2_156_04_S4_C1 | 0           | 0           | 0           | 0.13        | 0                                                    | 0  |                |      |
| 2_156_04_S4_C2 | 0           | 0           | 0           | 0.13        |                                                      |    |                |      |
| 2_156_04_S4_C3 | 0           | 0           | 0           | 0.13        |                                                      |    |                |      |
| 2_177_06_S1_C1 | 0           | 0.06        | 0           | 0.13        | 0                                                    | 0  | 0              | 0    |
| 2_177_06_S1_C2 | 0           | 0.06        | 0           | 0.13        |                                                      |    |                |      |
| 2_177_06_S1_C3 | 0           | 0.06        | 0           | 0.13        |                                                      |    |                |      |
| 2_177_06_S3_C1 | 0           | 0           | 0           | 0.13        | 0                                                    | 0  | 0              | 0    |
| 2_177_06_S3_C2 | 0           | 0           | 0           | 0.13        |                                                      |    |                |      |
| 2_177_06_S3_C3 | 0           | 0           | 0           | 0.13        |                                                      |    |                |      |
| 2_177_06_S4_C1 | 0           | 0           | 0           | 0.13        | 0                                                    | 0  |                |      |
| 2_177_06_S4_C2 | 0           | 0           | 0           | 0.13        |                                                      |    |                |      |
| 2_177_06_S4_C3 | 0           | 0           | 0           | 0.13        |                                                      |    |                |      |
| 2_210_07_S1_C2 | 0           | 0           | 0           | 0.13        | 0                                                    | 0  | 0              | 0    |
| 2_210_07_S1_C3 | 0           | 0           | 0           | 0.13        |                                                      |    |                |      |
| 2_210_07_S3_C1 | 0.33        | 0.99        | 0.31        | 0.13        | 1                                                    | 33 | 1              | 16.5 |
| 2_210_07_S3_C2 | 0           | 0           | 0           | 0.13        |                                                      |    |                |      |
| 2_210_07_S3_C3 | 0           | 0           | 0           | 0.13        |                                                      |    |                |      |
| 2_210_07_S4_C1 | 0           | 0           | 0           | 0.13        | 0                                                    | 0  |                |      |
| 2_210_07_S4_C2 | 0           | 0           | 0           | 0.13        |                                                      |    |                |      |
| 2_210_07_S4_C3 | 0           | 0           | 0           | 0.13        |                                                      |    |                |      |
| 2_222_05_S1_C1 | 0           | 0           | 0           | 0.13        | 0                                                    | 0  | 0              | 0    |
| 2_222_05_S1_C2 | 0           | 0           | 0           | 0.13        |                                                      |    |                |      |
| 2_222_05_S1_C3 | 0           | 0           | 0           | 0.13        |                                                      |    |                |      |
| 2_222_05_S3_C1 | 0           | 0           | 0           | 0.13        | 0                                                    | 0  | 0              | 0    |
| 2_222_05_S3_C2 | 0           | 0           | 0           | 0.13        |                                                      |    |                |      |
| 2_222_05_S3_C3 | 0           | 0           | 0           | 0.13        |                                                      |    |                |      |
| 2_222_05_S4_C1 | 0           | 0           | 0           | 0.13        | 0                                                    | 0  |                |      |
| 2_222_05_S4_C2 | 0           | 0           | 0           | 0.13        |                                                      |    |                |      |
| 2_222_05_S4_C3 | 0           | 0           | 0           | 0.13        |                                                      |    |                |      |
| 2_316_03_S1_C1 | 0           | 0           | 0           | 0.13        | 0                                                    | 0  | 0              | 0    |
| 2_316_03_S1_C2 | 0           | 0           | 0           | 0.13        |                                                      |    |                |      |
| 2_316_03_S3_C1 | 0           | 0           | 0           | 0.13        | 0                                                    | 0  |                |      |
| 2_316_03_S3_C2 | 0           | 0           | 0           | 0.13        |                                                      |    |                |      |

|                | <i>mphB</i> | <i>mphA</i> | <i>mphC</i> | <i>ermG</i> | total in<br>timepoint<br>with<br>resistance<br>genes | %   | pre vs<br>post | %  |
|----------------|-------------|-------------|-------------|-------------|------------------------------------------------------|-----|----------------|----|
| 2_316_03_S3_C3 | 0           | 0           | 0           | 0.13        |                                                      |     | 2              | 33 |
| 2_316_03_S4_C1 | 0.33        | 1           | 0.31        | 0.13        |                                                      |     |                |    |
| 2_316_03_S4_C2 | 0.33        | 1           | 0.31        | 0.13        | 2                                                    | 66  |                |    |
| 2_316_03_S4_C3 | 0           | 0           | 0           | 0.13        |                                                      |     |                |    |
| 2_427_07_S1_C1 | 0           | 0           | 0           | 0.13        | 0                                                    | 0   | 0              | 0  |
| 2_427_07_S1_C2 | 0           | 0           | 0           | 0.13        |                                                      |     |                |    |
| 2_427_07_S1_C3 | 0           | 0           | 0           | 0.13        |                                                      |     |                |    |
| 2_427_07_S3_C1 | 0           | 0           | 0           | 0.13        | 0                                                    | 0   | 2              | 40 |
| 2_427_07_S3_C3 | 0           | 0           | 0           | 0.13        |                                                      |     |                |    |
| 2_427_07_S4_C1 | 0.33        | 1           | 0.31        | 0.13        | 2                                                    | 66  |                |    |
| 2_427_07_S4_C2 | 0.33        | 1           | 0.31        | 0.13        |                                                      |     |                |    |
| 2_427_07_S4_C3 | 0           | 0           | 0           | 0.13        |                                                      |     |                |    |
| 2_460_02_S1_C1 | 0           | 0           | 0           | 0.13        | 2                                                    | 66  | 2              | 66 |
| 2_460_02_S1_C2 | 0.33        | 1           | 0.31        | 0.13        |                                                      |     |                |    |
| 2_460_02_S1_C3 | 0.33        | 1           | 0.31        | 0.13        |                                                      |     |                |    |
| 2_460_02_S3_C1 | 0           | 0           | 0           | 0.13        | 0                                                    | 0   | 3              | 50 |
| 2_460_02_S3_C2 | 0           | 0           | 0           | 0.13        |                                                      |     |                |    |
| 2_460_02_S3_C3 | 0           | 0           | 0           | 0.13        | 3                                                    | 100 |                |    |
| 2_460_02_S4_C1 | 0.33        | 1           | 0.31        | 0.13        |                                                      |     |                |    |
| 2_460_02_S4_C2 | 0.33        | 1           | 0.31        | 0.13        |                                                      |     |                |    |
| 2_460_02_S4_C3 | 0.33        | 1           | 0.31        | 0.13        |                                                      |     |                |    |
| 2_474_04_S1_C1 | 0           | 0           | 0           | 0.13        | 0                                                    | 0   | 0              | 0  |
| 2_474_04_S1_C2 | 0           | 0           | 0           | 0.13        |                                                      |     |                |    |
| 2_474_04_S3_C1 | 0           | 0           | 0           | 0.13        | 0                                                    | 0   | 0              | 0  |
| 2_474_04_S3_C2 | 0           | 0           | 0           | 0.13        |                                                      |     |                |    |
| 2_474_04_S3_C3 | 0           | 0           | 0           | 0.13        |                                                      |     |                |    |
| 2_474_04_S4_C1 | 0           | 0           | 0           | 0.13        | 0                                                    | 0   |                |    |
| 2_474_04_S4_C2 | 0           | 0           | 0           | 0.13        |                                                      |     |                |    |
| 2_474_04_S4_C3 | 0           | 0           | 0           | 0.13        |                                                      |     |                |    |
| 3_020_07_S1_C1 | 0           | 0           | 0           | 0.13        | 0                                                    | 0   | 0              | 0  |
| 3_020_07_S1_C2 | 0           | 0           | 0           | 0.13        |                                                      |     |                |    |
| 3_020_07_S1_C3 | 0           | 0           | 0           | 0.13        |                                                      |     |                |    |
| 3_020_07_S3_C1 | 0.33        | 1           | 0.31        | 0.13        | 2                                                    | 100 | 4              | 80 |
| 3_020_07_S3_C2 | 0.33        | 1           | 0.31        | 0.13        |                                                      |     |                |    |
| 3_020_07_S4_C1 | 0           | 0           | 0           | 0.13        | 2                                                    | 66  |                |    |
| 3_020_07_S4_C2 | 0.33        | 1           | 0.31        | 0.13        |                                                      |     |                |    |
| 3_020_07_S4_C3 | 0.33        | 1           | 0.31        | 0.13        |                                                      |     |                |    |
| 3_073_06_S1_C1 | 0           | 0           | 0           | 0.13        | 0                                                    | 0   | 0              | 0  |
| 3_073_06_S1_C2 | 0           | 0           | 0           | 0.13        |                                                      |     |                |    |
| 3_073_06_S3_C1 | 0           | 0           | 0           | 0.13        | 0                                                    | 0   | 0              | 0  |
| 3_073_06_S3_C2 | 0           | 0           | 0           | 0.13        |                                                      |     |                |    |
| 3_073_06_S4_C1 | 0           | 0           | 0           | 0.13        |                                                      |     |                |    |
| 3_073_06_S4_C2 | 0           | 0           | 0           | 0.13        | 0                                                    | 0   |                |    |
| 3_073_06_S4_C3 | 0           | 0           | 0           | 0.13        |                                                      |     |                |    |
| 3_105_05_S1_C1 | 0           | 0           | 0           | 0.13        | 1                                                    | 33  | 1              | 33 |
| 3_105_05_S1_C2 | 0.33        | 1           | 0.31        | 0.48        |                                                      |     |                |    |
| 3_105_05_S1_C3 | 0           | 0           | 0           | 0.13        |                                                      |     |                |    |
| 3_105_05_S3_C1 | 0           | 0           | 0           | 0.13        | 1                                                    | 33  | 2              | 33 |
| 3_105_05_S3_C2 | 0           | 0           | 0           | 0.13        |                                                      |     |                |    |
| 3_105_05_S3_C3 | 0.33        | 1           | 0.31        | 0.13        | 1                                                    | 33  |                |    |
| 3_105_05_S4_C1 | 0           | 0           | 0           | 0.13        |                                                      |     |                |    |
| 3_105_05_S4_C2 | 0           | 0           | 0           | 0.13        |                                                      |     |                |    |

|                | <i>mphB</i> | <i>mphA</i> | <i>mphC</i> | <i>ermG</i> | total in<br>timepoint<br>with<br>resistance<br>genes | %   | pre vs<br>post | %   |
|----------------|-------------|-------------|-------------|-------------|------------------------------------------------------|-----|----------------|-----|
| 3_105_05_S4_C3 | 0.33        | 1           | 0.31        | 0.13        |                                                      |     |                |     |
| 3_267_03_S1_C1 | 0           | 0           | 0           | 0.13        |                                                      |     |                |     |
| 3_267_03_S1_C2 | 0           | 0           | 0           | 0.13        | 0                                                    | 0   | 0              | 0   |
| 3_267_03_S1_C3 | 0           | 0           | 0           | 0.13        |                                                      |     |                |     |
| 3_267_03_S3_C1 | 0.33        | 1           | 0.31        | 0.13        | 1                                                    | 50  | 2              | 50  |
| 3_267_03_S3_C2 | 0           | 0           | 0           | 0.13        |                                                      |     |                |     |
| 3_267_03_S4_C1 | 0.33        | 1           | 0.31        | 0.13        | 1                                                    | 50  |                |     |
| 3_267_03_S4_C2 | 0           | 0           | 0           | 0.13        |                                                      |     |                |     |
| 3_373_03_S1_C1 | 0           | 0           | 0           | 0.13        |                                                      |     |                |     |
| 3_373_03_S1_C2 | 0           | 0           | 0           | 0.13        | 0                                                    | 0   | 0              | 0   |
| 3_373_03_S1_C3 | 0           | 0           | 0           | 0.13        |                                                      |     |                |     |
| 3_373_03_S3_C1 | 0           | 0           | 0           | 0.13        |                                                      |     |                |     |
| 3_373_03_S3_C2 | 0           | 0           | 0           | 0.13        | 0                                                    | 0   | 0              | 0   |
| 3_373_03_S3_C3 | 0           | 0           | 0           | 0.13        |                                                      |     |                |     |
| 3_373_03_S4_C1 | 0           | 0           | 0           | 0.13        |                                                      |     |                |     |
| 3_373_03_S4_C2 | 0           | 0           | 0           | 0.13        | 0                                                    | 0   |                |     |
| 3_373_03_S4_C3 | 0           | 0           | 0           | 0.13        |                                                      |     |                |     |
| 3_475_03_S1_C1 | 0           | 0           | 0           | 0.13        |                                                      |     |                |     |
| 3_475_03_S1_C2 | 0           | 0           | 0           | 0.13        | 0                                                    | 0   | 0              | 0   |
| 3_475_03_S3_C1 | 0           | 0           | 0           | 0.13        |                                                      |     |                |     |
| 3_475_03_S3_C2 | 0           | 0           | 0           | 0.13        | 0                                                    | 0   | 0              | 0   |
| 3_475_03_S4_C1 | 0           | 0           | 0           | 0.13        |                                                      |     |                |     |
| 3_475_03_S4_C2 | 0           | 0           | 0           | 0.13        | 0                                                    | 0   |                |     |
| 4_203_08_S1_C1 | 0           | 0           | 0           | 0.13        |                                                      |     |                |     |
| 4_203_08_S1_C2 | 0           | 0           | 0           | 0.13        | 0                                                    | 0   | 0              | 0   |
| 4_203_08_S1_C3 | 0           | 0           | 0           | 0.13        |                                                      |     |                |     |
| 4_203_08_S3_C1 | 0           | 0           | 0           | 0.13        |                                                      |     |                |     |
| 4_203_08_S3_C2 | 0           | 0           | 0           | 0.13        | 0                                                    | 0   | 1              | 20  |
| 4_203_08_S3_C3 | 0           | 0           | 0           | 0.13        |                                                      |     |                |     |
| 4_203_08_S4_C2 | 0           | 0.13        | 0           | 0.13        | 1                                                    | 50  |                |     |
| 4_203_08_S4_C3 | 0.25        | 0.72        | 0.23        | 0.13        |                                                      |     |                |     |
| 5_172_05_S1_C3 | 0.33        | 1           | 0.31        | 0.13        | 1                                                    | 100 | 1              | 100 |
| 5_172_05_S3_C1 | 0           | 0           | 0           | 0.13        | 0                                                    | 0   |                |     |
| 5_172_05_S3_C3 | 0           | 0           | 0           | 0.13        |                                                      |     | 0              | 0   |
| 5_172_05_S4_C1 | 0           | 0           | 0           | 0.13        |                                                      |     |                |     |
| 5_172_05_S4_C2 | 0           | 0           | 0           | 0.13        | 0                                                    | 0   |                |     |
| 5_172_05_S4_C3 | 0           | 0           | 0           | 0.13        |                                                      |     |                |     |
| 5_366_08_S1_C1 | 0           | 0           | 0           | 0.13        |                                                      |     |                |     |
| 5_366_08_S1_C3 | 0           | 0           | 0           | 0.13        | 0                                                    | 0   | 0              | 0   |
| 5_366_08_S3_C1 | 0.33        | 1           | 0.31        | 0.13        |                                                      |     |                |     |
| 5_366_08_S3_C2 | 0           | 0           | 0           | 0.13        | 2                                                    | 66  | 2              | 40  |
| 5_366_08_S3_C3 | 0.33        | 1           | 0.31        | 0.13        |                                                      |     |                |     |
| 5_366_08_S4_C1 | 0           | 0           | 0           | 0.13        | 0                                                    | 0   |                |     |
| 5_366_08_S4_C2 | 0           | 0           | 0           | 0.13        |                                                      |     |                |     |
| 6_175_07_S1_C1 | 0           | 0           | 0           | 0.13        |                                                      |     |                |     |
| 6_175_07_S1_C2 | 0           | 0           | 0           | 0.13        | 0                                                    | 0   | 0              | 0   |
| 6_175_07_S1_C3 | 0           | 0           | 0           | 0.13        |                                                      |     |                |     |
| 6_175_07_S3_C1 | 0           | 0           | 0           | 0.13        |                                                      |     |                |     |
| 6_175_07_S3_C2 | 0           | 0           | 0           | 0.13        | 0                                                    | 0   | 0              | 0   |
| 6_175_07_S3_C3 | 0           | 0           | 0           | 0.13        |                                                      |     |                |     |
| 6_175_07_S4_C1 | 0           | 0           | 0           | 0.13        |                                                      |     |                |     |
| 6_175_07_S4_C2 | 0           | 0           | 0           | 0.13        | 0                                                    | 0   |                |     |

|                | <i>mphB</i> | <i>mphA</i> | <i>mphC</i> | <i>ermG</i> | total in<br>timepoint<br>with<br>resistance<br>genes | %  | pre vs<br>post | %  |
|----------------|-------------|-------------|-------------|-------------|------------------------------------------------------|----|----------------|----|
| 6_175_07_S4_C3 | 0           | 0           | 0           | 0.13        |                                                      |    |                |    |
| 6_319_05_S1_C1 | 0           | 0           | 0           | 0.13        | 0                                                    | 0  | 0              | 0  |
| 6_319_05_S1_C2 | 0           | 0           | 0           | 0.13        |                                                      |    |                |    |
| 6_319_05_S1_C3 | 0           | 0           | 0           | 0.13        |                                                      |    |                |    |
| 6_319_05_S3_C1 | 0           | 0           | 0           | 0.13        |                                                      |    |                |    |
| 6_319_05_S3_C2 | 0           | 0           | 0           | 0.13        | 0                                                    | 0  | 0              | 0  |
| 6_319_05_S3_C3 | 0           | 0           | 0           | 0.13        |                                                      |    |                |    |
| 6_319_05_S4_C2 | 0           | 0           | 0           | 0.13        | 0                                                    | 0  |                |    |
| 6_319_05_S4_C3 | 0           | 0           | 0           | 0.13        |                                                      |    |                |    |
| 6_537_08_S1_C1 | 0           | 0           | 0           | 0.13        |                                                      |    |                |    |
| 6_537_08_S1_C2 | 0           | 0           | 0           | 0.13        | 0                                                    | 0  | 0              | 0  |
| 6_537_08_S1_C3 | 0.17        | 0.55        | 0.15        | 0.13        |                                                      |    |                |    |
| 6_537_08_S3_C1 | 0           | 0           | 0           | 0.13        |                                                      |    |                |    |
| 6_537_08_S3_C2 | 0           | 0           | 0           | 0.13        | 0                                                    | 0  | 0              | 0  |
| 6_537_08_S3_C3 | 0           | 0           | 0           | 0.13        |                                                      |    |                |    |
| 6_537_08_S4_C1 | 0           | 0           | 0           | 0.13        | 0                                                    | 0  |                |    |
| 6_537_08_S4_C2 | 0           | 0           | 0           | 0.13        |                                                      |    |                |    |
| 7_233_03_S1_C2 | 0           | 0           | 0           | 0.13        | 0                                                    | 0  | 0              | 0  |
| 7_233_03_S1_C3 | 0           | 0           | 0           | 0.13        |                                                      |    |                |    |
| 7_233_03_S3_C1 | 0.33        | 1           | 0.31        | 0.13        |                                                      |    |                |    |
| 7_233_03_S3_C2 | 0           | 0           | 0           | 0.13        | 2                                                    | 66 | 2              | 40 |
| 7_233_03_S3_C3 | 0.32        | 0.98        | 0.3         | 0.13        |                                                      |    |                |    |
| 7_233_03_S4_C1 | 0           | 0           | 0           | 0.13        |                                                      |    |                |    |
| 7_233_03_S4_C2 | 0           | 0           | 0           | 0.13        | 0                                                    | 0  |                |    |
| 7_233_03_S4_C3 | 0           | 0           | 0           | 0.13        |                                                      |    |                |    |
| 8_415_05_S1_C1 | 0           | 0           | 0           | 0.13        |                                                      |    |                |    |
| 8_415_05_S1_C2 | 0           | 0           | 0           | 0.13        | 0                                                    | 0  | 0              | 0  |
| 8_415_05_S3_C1 | 0           | 0           | 0           | 0.13        |                                                      |    |                |    |
| 8_415_05_S3_C2 | 0           | 0           | 0           | 0.13        | 0                                                    | 0  | 0              | 0  |
| 8_415_05_S3_C3 | 0           | 0           | 0           | 0.13        |                                                      |    |                |    |
| 8_415_05_S4_C1 | 0           | 0           | 0           | 0.13        |                                                      |    |                |    |
| 8_415_05_S4_C2 | 0           | 0           | 0           | 0.13        | 0                                                    | 0  |                |    |
| 8_415_05_S4_C3 | 0           | 0           | 0           | 0.13        |                                                      |    |                |    |
